# Supplementary material
Source: PubMed Central journal article supplement (PMC4017368)
Supplement: NIHMS569183-supplement-1.pdf [file NIHMS569183-supplement-1.pdf]

# Should I Continue Getting Mammograms after age 75?

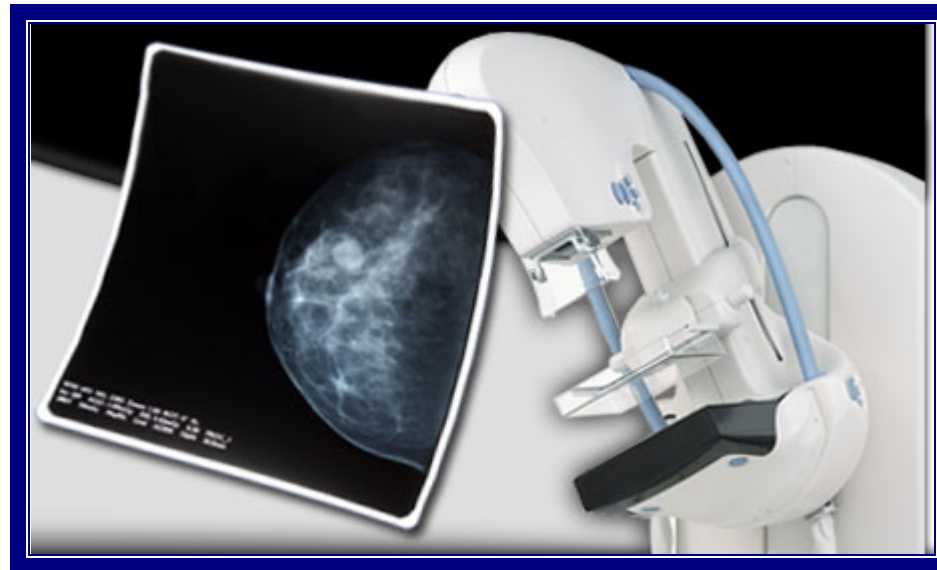

***This is a tool to help you make this decision.  
You will need a pen/pencil to complete parts of this tool.***

Copyright ©2013 by Beth Israel Deaconess Medical Center

Do not distribute or reprint without permission.

## What is the purpose of this tool?

- Doctors do not know if mammograms benefit women age 75 or older.
- This tool will help you think about whether or not you want to **stop** or **continue** getting mammograms.
- This tool is NOT for women who have had breast cancer or who have breast pain or symptoms.

## Breast cancer risk factors among women aged 75+

- The chance of getting breast cancer goes up with age. Women aged 75 and older have a higher chance of getting breast cancer than younger women. But breast cancers often grow slower in older women.
- It is not known if a family history of breast cancer increases your chances of getting breast cancer after age 75.

## Why do women get mammograms?

- Women get mammograms to find breast cancer early before it causes problems.
- Mammograms do not keep you from getting breast cancer.
- Mammograms do not find every breast cancer.
- Experts think that a small breast cancer found on an older woman's mammogram would not have caused problems for at least 5 or 10 years. Some of the cancers may never have caused problems.

## Am I in good enough health to get a mammogram?

On average a 75 year old woman will live to age 88 (13 more years)

On average an 80 year old woman will live to age 90 (10 more years)

On average an 85 year old woman will live to age 92 (7 more years)

On average a 90 year old woman will live to age 95 (5 more years)

The graph below shows **on average** how many more years women live at different ages.

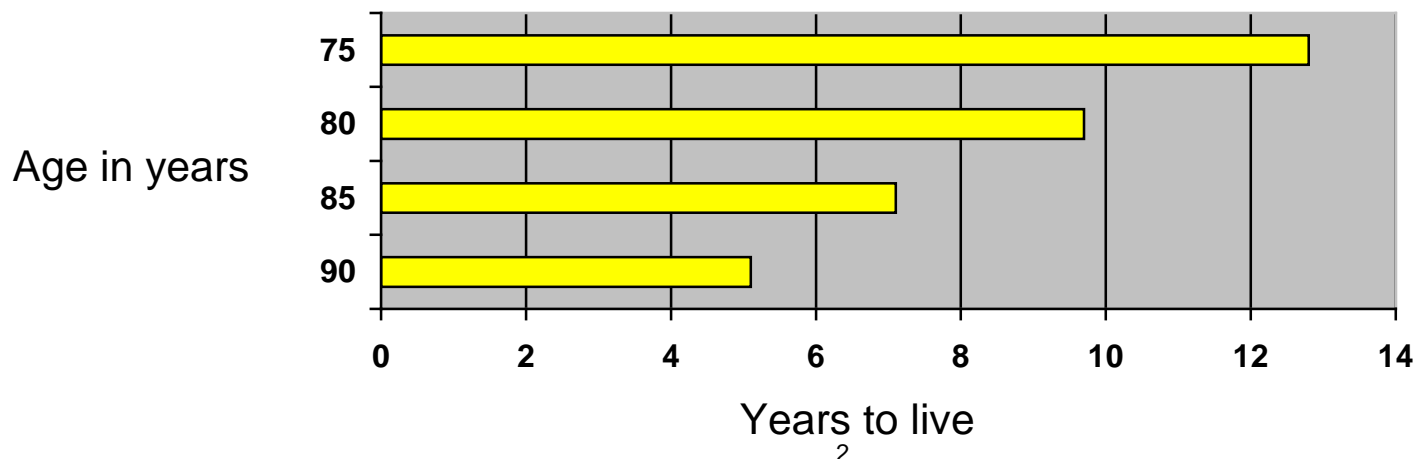

**Your health also influences whether you can benefit from getting a mammogram. Answer the questions below to learn more about your health.**

**Answer** the 10 questions below and **add up** your points from both pages to learn more about your health.

1. How old are you? **Points:**

|         |          |   |                              |  |
|---------|----------|---|------------------------------|--|
| 75 – 79 | 0 points | } | write your points here-----→ |  |
| 80 – 84 | 2 points |   |                              |  |
| 85+     | 4 points |   |                              |  |

2. How much do you weigh?

|                         |   |   |                                     |  |
|-------------------------|---|---|-------------------------------------|--|
| If more than 130 pounds | 0 | } | points write your points here-----→ |  |
| If 130 pounds or less   | 2 |   |                                     |  |

3. Would you say your health is:

Excellent (0 points)    Very Good (0 points)    Good (1 point)    Fair (2 points)    Poor (2 points)--→ \_\_\_\_\_

4. Have you ever been told by a doctor or health professional that you had emphysema or chronic bronchitis or COPD?

No (0 points)                      Yes (2 points)    write your points here-----→ \_\_\_\_\_

5. Have you ever been told by a doctor or health professional that you had a cancer? (do not include skin cancer unless it was melanoma)

No (0 points)                      Yes (2 points)    write your points here-----→ \_\_\_\_\_

6. Have you ever been told by a doctor or health professional that you had diabetes? (including borderline or pre-diabetes)

No (0 points)                      Yes (2 points)                      write your points here-----→ \_\_\_\_\_

**Total from this page** \_\_\_\_\_  
**Continue on next page**

## Learning About Your Health (continued)

7. Because of a physical, mental or emotional problem, do you need help from other people with routine needs? These include everyday household chores, shopping or getting around for other purposes?

No (0 points)

Yes (2 points)

write your points here----->

\_\_\_\_\_

8. By yourself and without using any special equipment, how difficult is it for you to walk a quarter of a mile (about 3 city blocks)?

Not at all difficult (0 points)

A little difficult to very difficult (3 points)

Can't do at all/do not do/can only do with a cane or walker (3 points)

} -->

\_\_\_\_\_

9. Which best describes your cigarette use?

Never smoked or smoked less than 100 cigarettes in your life (0 points)

Former smoker (1 point)

Current smoker (3 points)

} -->

\_\_\_\_\_

10. During the past 12 months, how many times were you hospitalized overnight?

None (0 points)

Once (1 point)

Twice or more (3 points)

}

write your points here----->

\_\_\_\_\_

Now add up all of your points from questions 1-10 from BOTH pages:

\_\_\_\_\_

Circle your score below to learn what it means:

0 1 2 3 4 5 6 7 8 9 10 11 or more

A mammogram may help you live longer

A mammogram is unlikely to help you live longer

A mammogram is very unlikely to help you live longer

What happens to 1,000 women age 75 or older who **CONTINUE** or **DO NOT** get mammograms over 5 years  
 -Each circle represents 1 woman out of 1,000-

Women like you who **CONTINUE** to get mammograms

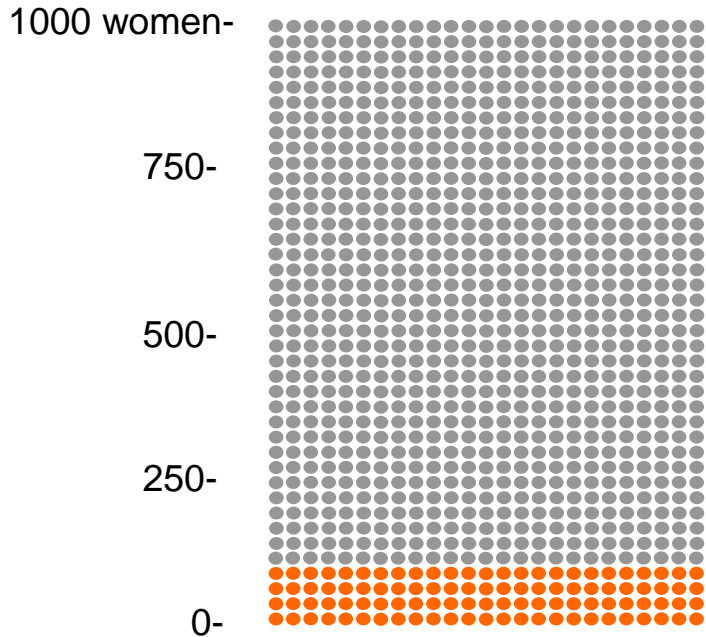

Women like you who **DO NOT** get mammograms

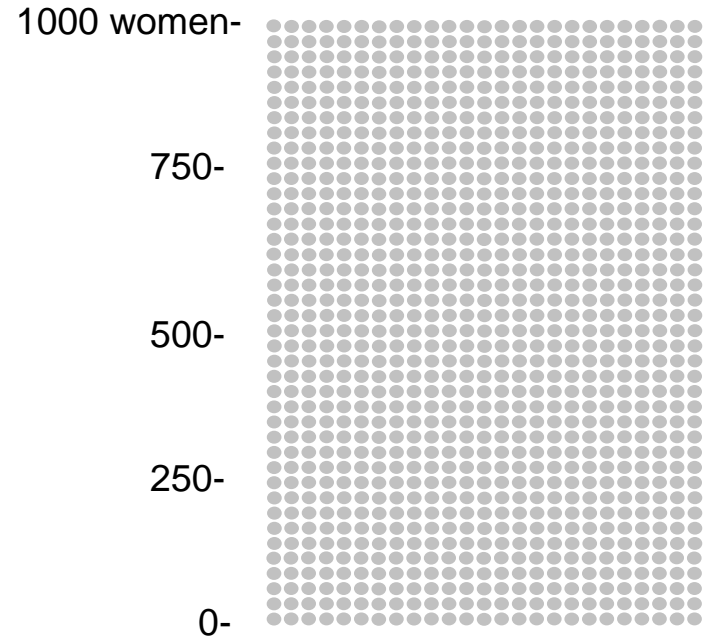

- **100 False Alarms** – These women have an abnormal mammogram but additional tests do not show breast cancer. Some women find this experience causes anxiety.

**0 False Alarms**

**Additional tests include:**

Additional Mammograms

Breast Ultrasounds

Breast Biopsies

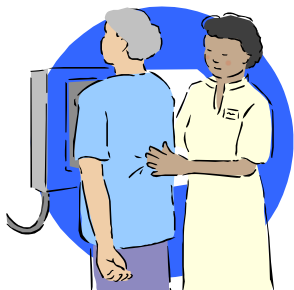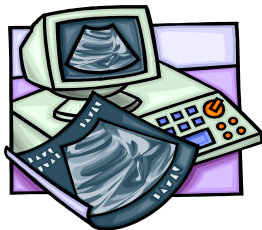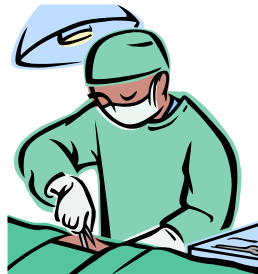

# What happens to 1,000 women age 75 or older who **CONTINUE** or **DO NOT** get mammograms over 5 years

## Women like you who **CONTINUE** to get mammograms

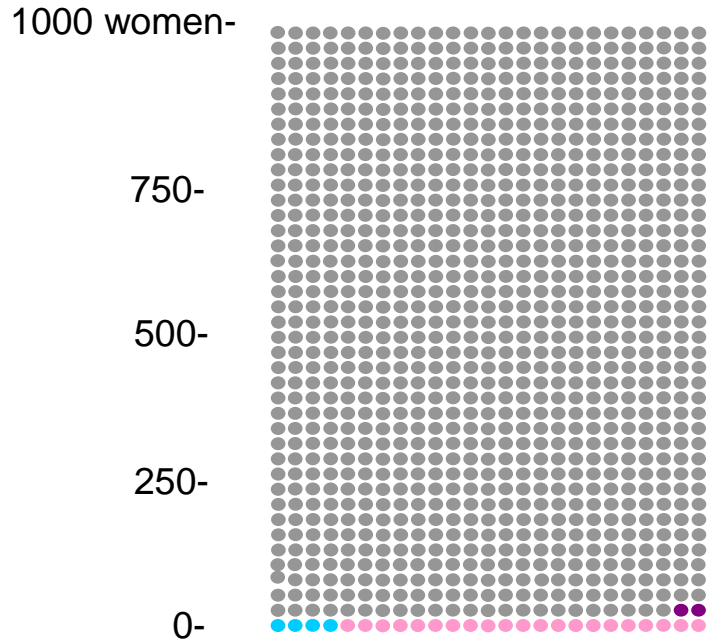

- **4** are diagnosed with a pre-cancer
- **20** are diagnosed with early stage breast cancer: cancer confined to the breast
- **2** are diagnosed with late stage breast cancer: cancer that spread outside the breast
- **974** are not diagnosed with breast cancer

## Women like you who **DO NOT** get mammograms

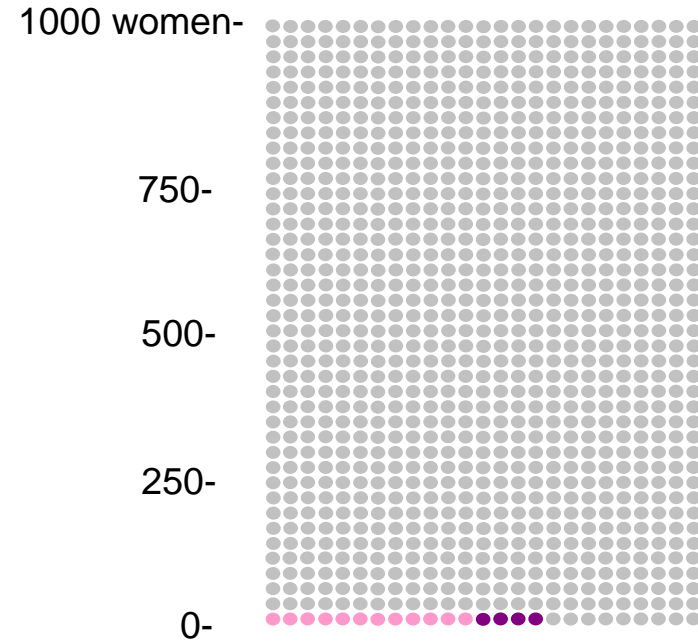

- **0** are diagnosed with pre-cancer
- **12** are diagnosed with early stage breast cancer: cancer confined to the breast
- **4** are diagnosed with late stage breast cancer: cancer that spread outside the breast
- **984** are not diagnosed with breast cancer

- **Summary:** Women who get mammograms are more likely to be diagnosed with pre-cancers and early stage breast cancers. Some of these cancers would not have caused problems in their lifetimes.

-Two more women out of 1,000 who do not get a mammogram are diagnosed with late stage breast cancer.

**Below is approximately the number of women age 75 or older out of 1,000 that will die of breast cancer in the next 5 years**

- Doctors are unsure that getting a mammogram will lower your chances of dying from breast cancer, some studies suggest the numbers below:

**Women like you who CONTINUE to get mammograms**

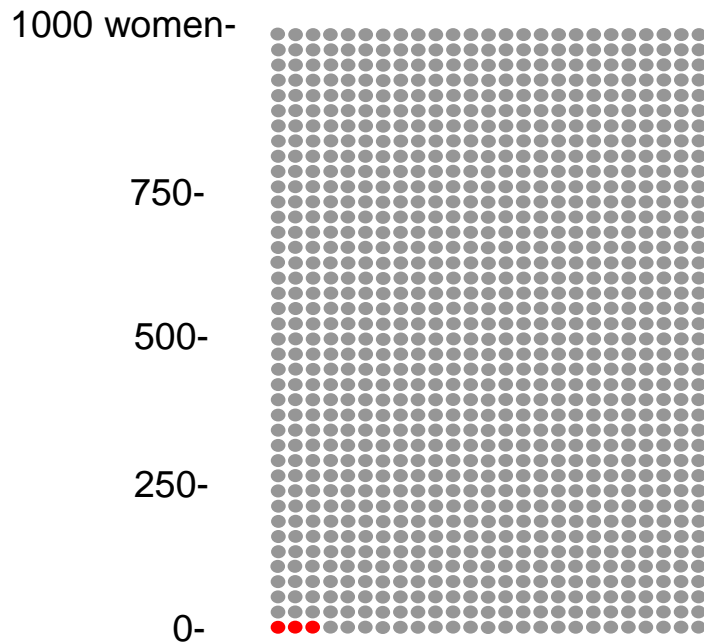

- **3 out of 1,000** women die of breast cancer

**Women like you who DO NOT get mammograms**

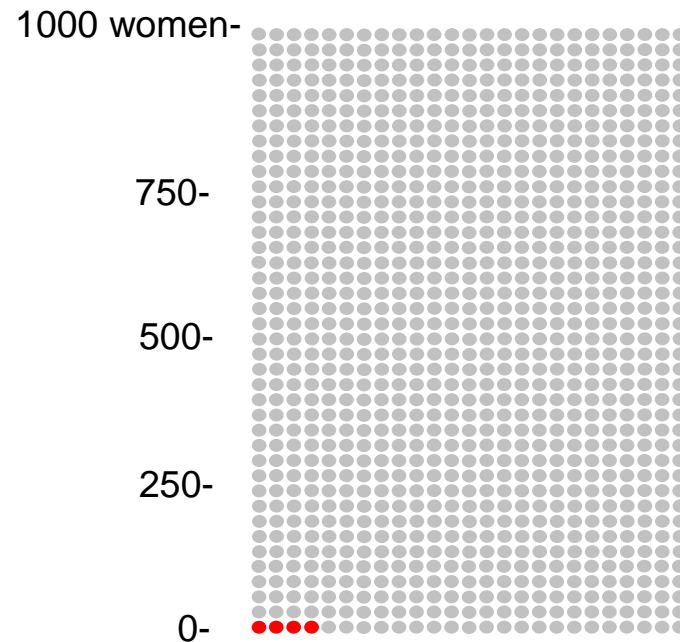

- **4 out of 1,000** women die of breast cancer

- **Summary:** Out of 1000 women 1 less woman may die of breast cancer who chooses to get a mammogram



**Below are the causes of death among 1,000 women age 75 and older who die in the next 5 years**

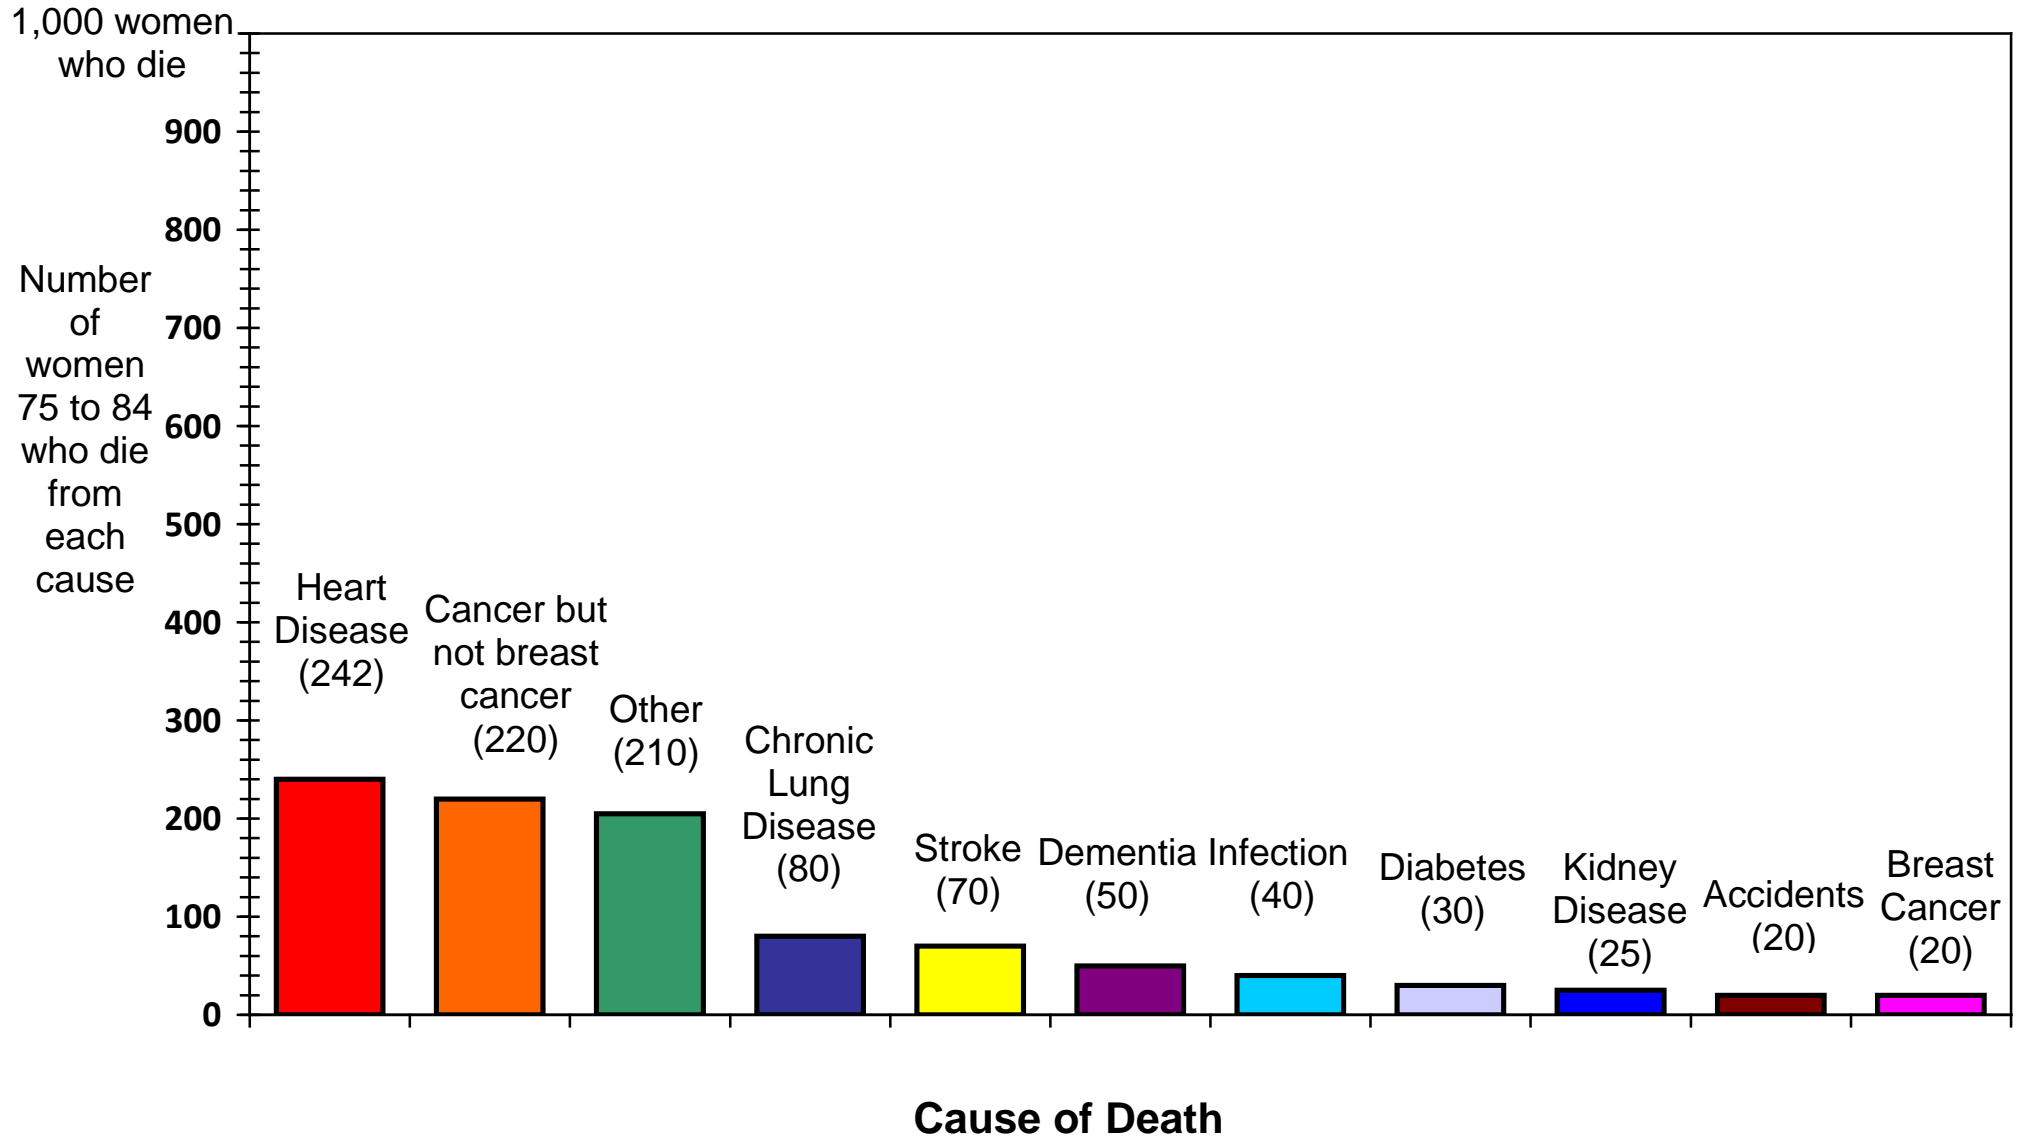

- **Many more women age 75 and older die of heart disease than breast cancer.**

Below are treatments offered to women with breast cancer. It is important to think about whether you would be willing to be treated before getting a mammogram.

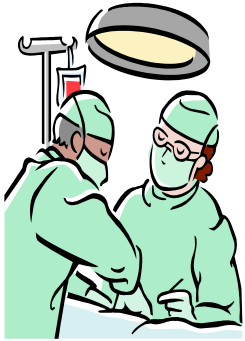

### SURGERY:

- **Breast-Conserving Surgery (lumpectomy):** Only the lump of breast cancer is removed from the breast. Most older women do well after this surgery.
- **Mastectomy:** Surgical removal of the breast. Some older women experience pain, infection, swelling in their arm, and even death after mastectomy.

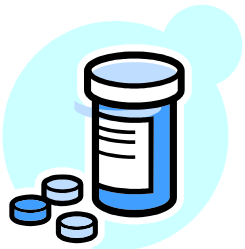

**PILLS:** Hormonal therapy pills are generally taken for 5 years to prevent breast cancer from coming back. These pills may cause hot flashes, bone pain, osteoporosis, or fatigue in some women.

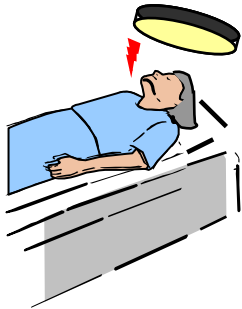

**RADIATION THERAPY:** The use of high-energy radiation to get rid of cancer cells. Radiation usually requires transportation to a medical center 5 days a week for several weeks. Radiation may cause fatigue and breast pain.

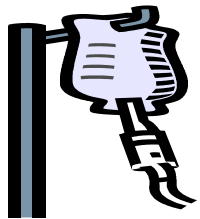

**CHEMOTHERAPY:** An intravenous (IV) medication that is given weekly to get rid of cancer cells. These drugs can have side effects like vomiting, fatigue, diarrhea, or infections. Few women age 75 or older are treated with chemotherapy.

**Below are some of the pros and cons of getting a mammogram. Check ✓ the points that are important to you when deciding whether or not to get a mammogram. Add more check marks ✓ if a point is more important to you than other points.**

**Pros to getting a mammogram**

- \_\_\_\_1. A mammogram is more likely to find breast cancer when it is small, improving my chances of only needing a minor surgery.
  
- \_\_\_\_2. Getting a mammogram may lower my chances of dying from breast cancer, but this is not certain.
  
- \_\_\_\_3. Getting a mammogram may help me feel good about myself and my health.

**Other Pros that Matter to You**

---

---

---

**Cons to getting a mammogram**

- \_\_\_\_1. A mammogram may find a breast cancer that would never have caused problems or symptoms in my lifetime.
  
- \_\_\_\_2. Getting a mammogram may increase the number of tests (additional mammograms, ultrasounds, and breast biopsies) or treatments (surgeries, radiation, chemotherapy, pills) that I get. Some of these tests or treatments can harm older women.
  
- \_\_\_\_3. Getting a mammogram may be uncomfortable or make me feel anxious.

**Other Cons that Matter to You**

---

---

---

# In the next year are you going to get a mammogram?

Please place a check mark  in one of the boxes below:

If you are sure you want a mammogram, check the box far to the **LEFT**.

If you are sure you do **NOT** want a mammogram, check the box far to the **RIGHT**.

If you are unsure, check a box somewhere in between.

**In the next year:**

|  |  |  |  |  |  |  |  |  |  |  |  |  |  |  |
|--|--|--|--|--|--|--|--|--|--|--|--|--|--|--|
|  |  |  |  |  |  |  |  |  |  |  |  |  |  |  |
|--|--|--|--|--|--|--|--|--|--|--|--|--|--|--|

**I Will**  
Get a Mammogram

**I am Undecided**

**I Will NOT**  
Get a Mammogram

Now, you may want to talk about what you have learned from this tool with your doctor.

\*The numbers presented in this booklet are the best available from the medical literature. Last updated: 9/2013.

**eTable1. Decision Aid References and Content Justification:**

| Issue                                                                  | Justification                                                                                                                                                                                                                                                                                                                                                                                                                                                                                                                                                                                                                                                                                                                                                                                                                                                                                                                                                                                                                                                                                                                                                                                                                                                                                                                                                                                                             | Written in the Decision Aid                                                                                                                                                                                                                                                                                                                                                                                                                                                                                                                                                                                                                                                                                                                               |
|------------------------------------------------------------------------|---------------------------------------------------------------------------------------------------------------------------------------------------------------------------------------------------------------------------------------------------------------------------------------------------------------------------------------------------------------------------------------------------------------------------------------------------------------------------------------------------------------------------------------------------------------------------------------------------------------------------------------------------------------------------------------------------------------------------------------------------------------------------------------------------------------------------------------------------------------------------------------------------------------------------------------------------------------------------------------------------------------------------------------------------------------------------------------------------------------------------------------------------------------------------------------------------------------------------------------------------------------------------------------------------------------------------------------------------------------------------------------------------------------------------|-----------------------------------------------------------------------------------------------------------------------------------------------------------------------------------------------------------------------------------------------------------------------------------------------------------------------------------------------------------------------------------------------------------------------------------------------------------------------------------------------------------------------------------------------------------------------------------------------------------------------------------------------------------------------------------------------------------------------------------------------------------|
| <p><b>Breast Cancer Risk Factors Among Women Aged 75 and Older</b></p> | <p>-Performed a systematic review of PubMed of breast cancer risk factors for older women (MeSH terms: “breast cancer” and “risk factors” and “women” and “65+”)<br/>                     -Found only few studies that focused on breast cancer risk factors for older women and most were case-control studies.<sup>1-20</sup><br/>                     -Results conflicted as to the influence of family history and reproductive factors (e.g., parity, age of menarche) on older women’s breast cancer risk.<sup>4,11,13,15-17</sup><br/>                     The Gail model, the most widely available breast cancer risk model was developed in a cohort of women that included only 11 cases of breast cancer among women <math>\geq 75</math> years compared to 1,341 cases among younger women.<sup>21</sup><br/>                     -Concluded that increasing age is associated with increased risk of breast cancer; however the influence of other traditional breast cancer risk factors (e.g. family history) on breast cancer risk among women <math>\geq 75</math> years is uncertain.<br/>                     -We note the uncertainty surrounding the influence of family history on breast cancer risk among women <math>\geq 75</math> years rather than other risk factors since family history strongly influences older women’s screening preferences.<sup>22,23</sup></p>                      | <p>-The chances of getting breast cancer go up with age. Women aged 75 and older have a higher chance of getting breast cancer than younger women.<br/>                     -It is not known if a family history of breast cancer increases your chances of getting breast cancer after age 75.</p>                                                                                                                                                                                                                                                                                                                                                                                                                                                       |
| <p><b>Health/Life expectancy</b></p>                                   | <p>-Experts recommend that patient life expectancy be factored into mammography screening decisions.<sup>24-28</sup><br/>                     -Estimates for lag-time to benefit for mammography screening for older women range from 5 to 10 years.<sup>25-27,29</sup><br/>                     -We present the average life expectancy for women aged 75, 80, 85, and 90 from US life tables.<sup>30</sup><br/>                     -To help women factor their individualized health in their mammography screening decision, we ask women 10 questions from a previously developed and validated mortality index that estimates up to 9 year mortality for older adults<sup>31,32</sup> (available at <a href="http://www.e prognosis.org">www.e prognosis.org</a>). The original index has 11 questions but one of the questions asks about gender. Since all users of our decision aid are female we did not include this question. Although, each score on the index is associated with a 5 and 9 year mortality risk, we chose not to present individualized mortality risk since we did not want our DA to cause anxiety. Instead, we inform users how their health score affects whether or not getting a mammogram may help them live longer. Our point score is also adjusted for the fact that all users of the DA are 75 years or older- the mortality index was developed for women aged 65 and older.</p> | <p>-Experts think that a small breast cancer found on an older woman’s mammogram would not have caused problems for at least 5 or 10 years. Some of the cancers may never have caused problems.<br/>                     -On average a 75 year old woman will live to age 88 (13 more years).<br/>                     On average an 80 year old woman will live to age 90 (10 more years).<br/>                     On average an 85 year old woman will live to age 92 (7 more years).<br/>                     On average a 90 year old woman will live to age 95 (5 more years).<br/>                     -Your health influences whether you can benefit from getting a mammogram. Answer the questions below to learn more about your health...</p> |

| Issue                                                                                                    | Justification                                                                                                                                                                                                                                                                                                                                                                                                                                                                                                                                                                                                                                                                                                                                                                                                                                                                                                                                                                                                                                                                                                                                                                                                                                                                                                                                                                                                                                                                                                                                                                                                                                                                                                                                                                                                                                                                                                                                                                                                                                                                                                                                                                                        | Written in the Decision Aid                                                                                                                                                                                                                                                                                                                                                    |
|----------------------------------------------------------------------------------------------------------|------------------------------------------------------------------------------------------------------------------------------------------------------------------------------------------------------------------------------------------------------------------------------------------------------------------------------------------------------------------------------------------------------------------------------------------------------------------------------------------------------------------------------------------------------------------------------------------------------------------------------------------------------------------------------------------------------------------------------------------------------------------------------------------------------------------------------------------------------------------------------------------------------------------------------------------------------------------------------------------------------------------------------------------------------------------------------------------------------------------------------------------------------------------------------------------------------------------------------------------------------------------------------------------------------------------------------------------------------------------------------------------------------------------------------------------------------------------------------------------------------------------------------------------------------------------------------------------------------------------------------------------------------------------------------------------------------------------------------------------------------------------------------------------------------------------------------------------------------------------------------------------------------------------------------------------------------------------------------------------------------------------------------------------------------------------------------------------------------------------------------------------------------------------------------------------------------|--------------------------------------------------------------------------------------------------------------------------------------------------------------------------------------------------------------------------------------------------------------------------------------------------------------------------------------------------------------------------------|
| <b>False positive mammograms</b>                                                                         | <p>-Based on literature review, we present that 100 out of 1,000 older women screened experience a false positive mammogram over 5 years.<sup>33-38</sup></p> <p>-We chose not to present confidence intervals around our point estimate of 10% since doing so can increase confusion.<sup>39,40</sup></p> <p>-We inform women what additional tests (e.g., ultrasound, breast biopsy) may occur after a false alarm and that many women find this experience causes anxiety.<sup>41-45</sup></p>                                                                                                                                                                                                                                                                                                                                                                                                                                                                                                                                                                                                                                                                                                                                                                                                                                                                                                                                                                                                                                                                                                                                                                                                                                                                                                                                                                                                                                                                                                                                                                                                                                                                                                    | <p>What happens to 1,000 women age 75 or older who continue to get mammograms over 5 years:</p> <p>100 false alarms-These women have an abnormal mammogram but additional tests do not show breast cancer. Some women find this experience causes anxiety. Additional tests include: additional mammograms, breast ultrasounds, and breast biopsies</p>                        |
| <b>Number of breast cancer cases diagnosed if screened or not screened with mammography after age 75</b> | <p>-We initially presented that among 1,000 women <math>\geq 75</math> years screened, 4 will be diagnosed with pre-cancer, 19 will be diagnosed with early stage breast cancer, and 2 will be diagnosed with late stage breast cancer (25 total).</p> <p>-We also presented that among 1,000 women <math>\geq 75</math> years who choose not to be screened, 0 will be diagnosed with pre-cancer, 10 will be diagnosed with early stage breast cancer and 3 will be diagnosed with late stage breast cancer (13 total).</p> <p>These numbers were based on information from several data sources:</p> <ul style="list-style-type: none"> <li>• Barrat et al. in a Markov model found that 41 women age 70 who are screened over 10 years will be diagnosed with invasive breast cancer compared to 26 women not screened.<sup>33</sup> Our numbers are ~half of these figures since our time frame is only 5 years.</li> <li>• SEER data suggest that the risk of breast cancer in the next 5 years for the average US woman <math>\geq 75</math> years is 2% (20 out of 1,000-these numbers do not distinguish between those who are screened with mammography and those who are not screened).<sup>1,46</sup></li> <li>• In SEER-Medicare analyses, 25% of breast cancers found among older women who are not screened are stage III-IV compared to 5-10% of older women who are screened.<sup>47-49</sup></li> <li>• Ductal Carcinoma in situ (DCIS) accounts for 16% of screen-detected tumors and nearly 0 for women not screened.<sup>50,51</sup></li> </ul> <p>Since our original literature review there is increasing debate about the best methodology for estimating overdiagnosis.<sup>52-55</sup> Studies with reasonable assumptions for breast cancer incidence in the absence of screening and that adjust for lead-time in detection of breast cancer by mammography suggest that the over-diagnosed proportion of breast cancers (invasive and non-invasive) among women undergoing screening is between 20 to 35%.<sup>55-59</sup> However, overdiagnosis is thought to increase with age since older women tend to have less aggressive tumors with more favorable biologic</p> | <p>-[In addition to presenting numbers diagnosed with breast cancer, we summarize:] More women who get mammograms will be diagnosed with pre-cancers and early stage breast cancer in their lifetimes. Some of these cancers would never have caused problems.</p> <p>-Two more woman out of 1,000 who do not get a mammogram are diagnosed with late stage breast cancer.</p> |

| Issue                                 | Justification                                                                                                                                                                                                                                                                                                                                                                                                                                                                                                                                                                                                                                                                                                                                                                                                                                                                                                                                                                                                                                                                                                                                                                                                                                                                                                                                                                                                                                                                                                                                                                                                                                                                                                                                                                                                                                                                                                                                                                                   | Written in the Decision Aid                                                                                                                                                                                                                                                                       |
|---------------------------------------|-------------------------------------------------------------------------------------------------------------------------------------------------------------------------------------------------------------------------------------------------------------------------------------------------------------------------------------------------------------------------------------------------------------------------------------------------------------------------------------------------------------------------------------------------------------------------------------------------------------------------------------------------------------------------------------------------------------------------------------------------------------------------------------------------------------------------------------------------------------------------------------------------------------------------------------------------------------------------------------------------------------------------------------------------------------------------------------------------------------------------------------------------------------------------------------------------------------------------------------------------------------------------------------------------------------------------------------------------------------------------------------------------------------------------------------------------------------------------------------------------------------------------------------------------------------------------------------------------------------------------------------------------------------------------------------------------------------------------------------------------------------------------------------------------------------------------------------------------------------------------------------------------------------------------------------------------------------------------------------------------|---------------------------------------------------------------------------------------------------------------------------------------------------------------------------------------------------------------------------------------------------------------------------------------------------|
|                                       | <p>characteristics (e.g., greater percent of estrogen [ER] positive tumors).<sup>60,61</sup> Therefore, after conducting the pretest/posttest trial we revised the numbers of women screened vs. not screened diagnosed with breast cancer presented in pictographs. We now present:</p> <ul style="list-style-type: none"> <li>• Among 1,000 women <math>\geq 75</math> years screened, 4 will be diagnosed with DCIS, 20 will be diagnosed with early stage breast cancer, and 2 will be diagnosed with late stage breast cancer (26 total)</li> <li>• We present that among 1,000 women 75-84 years who choose not to be screened, 12 will be diagnosed with early stage breast cancer and 4 will be diagnosed with late stage breast cancer (16 total).</li> <li>• Our numbers show that the incidence of invasive breast cancer over 5 years is 2.2% if screened and 1.6% if not screened.</li> <li>• Our numbers show that 9% (2/22) of invasive breast cancers detected among women who are screened are early stage compared to 25% (4/16) of women not screened.</li> <li>• We show that DCIS accounts for 15% (4/26) of screen-detected tumors and 0% of cases among women not screened.</li> <li>• While our numbers show that 10 more breast cancers will be detected among women screened, some of these cases represent early diagnosis (~2) and some overdiagnosis (~8); therefore, our pictographs show an overdiagnosis rate of 31% (8/26 including DCIS) which is consistent with estimates of overdiagnosis from studies with reasonable clinical assumptions.</li> </ul> <p>Due to the large variation in reported rates of overdiagnosis, we do not present a frequency for overdiagnosis in the text.<sup>53</sup> We simply state that more women who get mammograms will be diagnosed with pre-cancers and early stage breast cancer in their lifetimes and that some of these cancers represent cases of overdiagnosis and some are breast cancers detected early.</p> |                                                                                                                                                                                                                                                                                                   |
| <p><b>Breast Cancer Mortality</b></p> | <p>-None of the randomized controlled trials evaluating mammography screening included women <math>\geq 75</math> years, therefore a mortality benefit of mammography screening for women <math>\geq 75</math> years is uncertain. We inform users of the uncertainty of a mortality benefit.</p> <p>- Based on observational data (detailed below) we present that 4 out of 1,000 women <math>\geq 75</math> years that are screened die of breast cancer compared to 3 out of 1,000 women that are not screened over 5 years.<sup>33,36-38,47,48,62,63</sup></p> <ul style="list-style-type: none"> <li>• Using a Markov process model, Barrat et al. found that 6 women out of 1,000 aged 70 who are screened for breast cancer regularly will die</li> </ul>                                                                                                                                                                                                                                                                                                                                                                                                                                                                                                                                                                                                                                                                                                                                                                                                                                                                                                                                                                                                                                                                                                                                                                                                                                | <p>-Doctors are unsure that getting a mammogram will lower your chances of dying from breast cancer but some studies suggest the numbers below.</p> <p>- [In addition to the numbers, we summarize:] Out of 1000 women, 1 less woman may die of breast cancer who chooses to get a mammogram.</p> |

| Issue                            | Justification                                                                                                                                                                                                                                                                                                                                                                                                                                                                                                                                                                                                                                                                                                                                                                                                                                                                                                                                                                                                                                                                                                                                                                                                                                                                                                                                                                                                                                                                                                                                                                                                  | Written in the Decision Aid                                                                                                                                                                                                                                                                                                                                                                                                                                                                                                                      |
|----------------------------------|----------------------------------------------------------------------------------------------------------------------------------------------------------------------------------------------------------------------------------------------------------------------------------------------------------------------------------------------------------------------------------------------------------------------------------------------------------------------------------------------------------------------------------------------------------------------------------------------------------------------------------------------------------------------------------------------------------------------------------------------------------------------------------------------------------------------------------------------------------------------------------------------------------------------------------------------------------------------------------------------------------------------------------------------------------------------------------------------------------------------------------------------------------------------------------------------------------------------------------------------------------------------------------------------------------------------------------------------------------------------------------------------------------------------------------------------------------------------------------------------------------------------------------------------------------------------------------------------------------------|--------------------------------------------------------------------------------------------------------------------------------------------------------------------------------------------------------------------------------------------------------------------------------------------------------------------------------------------------------------------------------------------------------------------------------------------------------------------------------------------------------------------------------------------------|
|                                  | <p>of breast cancer within 10 years compared to 8 women aged 70 not screened for an absolute reduction of 2 breast cancer deaths over 10 years.<sup>33</sup></p> <ul style="list-style-type: none"> <li>• Others estimate that for 1,000 women aged 70 screened for 10 years, 45 will develop breast cancer and 9 will die of breast cancer.<sup>33,64</sup></li> <li>• A cohort study of women <math>\geq 80</math> years that followed women for a median of 5 years found that among <math>\sim 1,000</math> women screened 1 woman died of breast cancer compared to 2 out of <math>\sim 1,000</math> women not screened.<sup>37</sup></li> <li>• The randomized control trials of mammography screening found that after 5 years follow-up among women 65-74, 2 of 1,000 women died of breast cancer. The survival curves begin to separate at around 5 years, and breast cancer mortality was higher among women who were not screened.<sup>63</sup></li> <li>• Some studies estimate the absolute risk reduction in breast cancer mortality for an 80 year old women to be 1 in 500 over 5 years.<sup>65,66</sup></li> <li>• Others estimate the mortality reduction to be 1 in 1,000 over 10 years.<sup>26</sup></li> <li>• Several observational studies found a mortality benefit for screening women <math>\geq 75</math> years in good health with mammography.<sup>47,48,62,67</sup></li> <li>• Studies that do show a mortality benefit for mammography screening among women of all ages generally show around a 15% to 25% reduction in breast cancer mortality.<sup>36,68-71</sup></li> </ul> |                                                                                                                                                                                                                                                                                                                                                                                                                                                                                                                                                  |
| <b>Competing mortality risks</b> | <p>-We present that out of 1,000 women <math>\geq 75</math> years who die in the next 5 years, 242 die of heart disease, 220 of cancer but not breast cancer, 210 from other causes, 80 from lung disease, 70 from stroke, 50 from dementia, 40 from infection, 30 from diabetes, 20 from kidney disease, 20 from accidents, and 20 from breast cancer. These estimates are from CDC mortality charts and Woloshin et al.'s risks of mortality for older women.<sup>72-75</sup></p>                                                                                                                                                                                                                                                                                                                                                                                                                                                                                                                                                                                                                                                                                                                                                                                                                                                                                                                                                                                                                                                                                                                            | <p>[In addition to a figure showing the number of women likely to die from the various causes, we summarize:] Many more women age 75 and older dies of heart disease than breast cancer.</p>                                                                                                                                                                                                                                                                                                                                                     |
| <b>Breast cancer treatments</b>  | <p>-We briefly describe the most common breast cancer treatments offered to older women based on the national guidelines and reviews.<sup>76-78</sup></p> <p>-We present common side effects of treatment among older women.<sup>76,79</sup></p> <p>-Since older women worry about being treated with chemotherapy,<sup>23</sup> we note that few older women with breast cancer are treated with chemotherapy.<sup>61</sup></p>                                                                                                                                                                                                                                                                                                                                                                                                                                                                                                                                                                                                                                                                                                                                                                                                                                                                                                                                                                                                                                                                                                                                                                               | <p><u>Surgery:</u> Breast-Conserving Surgery (lumpectomy): only the lump of breast cancer is removed from the breast. Mastectomy: surgical removal of the breast. Some older women experience pain, infection, swelling in their arm, and even death after mastectomy.<sup>78</sup> Most older women do well after lumpectomy.<sup>80</sup></p> <p><u>Pills:</u> Hormonal therapy pills are generally taken for 5 years to prevent breast cancer from coming back. These pills may cause hot flashes, bone pain, osteoporosis, or fatigue in</p> |



| Issue | Justification | Written in the Decision Aid                                                                                                                                                                                                                                                                                                                                                                                                                                                                                                                                             |
|-------|---------------|-------------------------------------------------------------------------------------------------------------------------------------------------------------------------------------------------------------------------------------------------------------------------------------------------------------------------------------------------------------------------------------------------------------------------------------------------------------------------------------------------------------------------------------------------------------------------|
|       |               | <p>some women.<sup>76,81-83</sup></p> <p><u>Radiation therapy:</u> The use of high-energy radiation to get rid of cancer cells. Radiation usually requires transportation to a medical center 5 days a week for several weeks. Radiation may cause fatigue and breast pain.<sup>84-86</sup></p> <p><u>Chemotherapy:</u> An intravenous (IV) medication that is given weekly to get rid of cancer cells. These drugs can have side effects like vomiting, fatigue, diarrhea, or infections.<sup>87-89</sup> Few women age 75 or older are treated with chemotherapy.</p> |

## References for Decision Aid Content:

1. Data on Seer (Surveillance, Epidemiology and End Results) cancer statistics. [http://seer.cancer.gov/csr/1975\\_2003/results\\_merged/sect\\_04\\_breast.pdf](http://seer.cancer.gov/csr/1975_2003/results_merged/sect_04_breast.pdf) . Accessed on October 15, 2013.
2. La Vecchia C, Negri E, Bruzzi P, et al. The role of age at menarche and at menopause on breast cancer risk: Combined evidence from four case-control studies. *Ann Oncol.* 1992; 3: 625-629.
3. Cauley JA, Lucas FL, Kuller LH, Vogt MT, Browner WS, Cummings SR. Bone mineral density and risk of breast cancer in older women: the study of osteoporotic fractures. Study of Osteoporotic Fractures Research Group. *JAMA.* 1996; 276(17):1404-1408.
4. Chun J, Pocock B, Joseph KA, El-Tamer M, Klein L, Schnabel F. Breast cancer risk factors in younger and older women. *Ann Surg Oncol.* 2009;16(1):96-99.
5. Ganry O, Baudoin C, Fardellone P, Peng J, Raverdy N. Bone mass density and risk of breast cancer and survival in older women. *Eur J Epidemiol.* 2004;19(8):785-792.
6. Horn J, Asvold BO, Opdahl S, Tretli S, Vatten LJ. Reproductive factors and the risk of breast cancer in old age: a Norwegian cohort study. *Breast Cancer Res Treat.* 2013;139(1):237-243.
7. Kerlikowske K, Cook AJ, Buist DS, et al. Breast cancer risk by breast density, menopause, and postmenopausal hormone therapy use. *J Clin Oncol.* 2010;28(24):3830-3837.
8. Lawlor DA, Ebrahim S, Smith GD. Smoking before the birth of a first child is not associated with increased risk of breast cancer: findings from the British Women's Heart and Health Cohort Study and a meta-analysis. *Br J Cancer.* 2004;91(3):512-518.
9. Li CI, Malone KE, Daling JR. The relationship between various measures of cigarette smoking and risk of breast cancer among older women 65-79 years of age (United States). *Cancer Causes Control.* 2005;16(8):975-985.
10. Li CI, Malone KE, Porter PL, Weiss NS, Tang MT, Daling JR. Reproductive and anthropometric factors in relation to the risk of lobular and ductal breast carcinoma among women 65-79 years of age. *Int J Cancer.* 2003;107(4):647-651.
11. Mettlin C, Croghan I, Natarajan N, Lane W. The association of age and familial risk in a case-control study of breast cancer. *Am J Epidemiol.* 1990;131(6):973-983.
12. Morimoto LM, White E, Chen Z, et al. Obesity, body size, and risk of postmenopausal breast cancer: the Women's Health Initiative (United States). *Cancer Causes Control.* 2002;13(8):741-751.
13. Poynter JN, Inoue-Choi M, Ross JA, Jacobs DR, Jr., Robien K. Reproductive, lifestyle, and anthropometric risk factors for cancer in elderly women. *Cancer Epidemiol Biomarkers Prev.* 2013;22(4):681-687.
14. Schousboe JT, Kerlikowske K, Loh A, Cummings SR. Personalizing mammography by breast density and other risk factors for breast cancer: analysis of health benefits and cost-effectiveness. *Ann Intern Med.* 2011;155(1):10-20.
15. Shantakumar S, Terry MB, Paykin A, et al. Age and menopausal effects of hormonal birth control and hormone replacement therapy in relation to breast cancer risk. *Am J Epidemiol.* 2007;165(10):1187-1198.
16. Shantakumar S, Terry MB, Teitelbaum SL, et al. Reproductive factors and breast cancer risk among older women. *Breast Cancer Res Treat.* 2007;102(3):365-374.

17. Sweeney C, Blair CK, Anderson KE, Lazovich D, Folsom AR. Risk factors for breast cancer in elderly women. *Am J Epidemiol.* 2004;160(9):868-875.
18. Vacek PM, Skelly JM, Geller BM. Breast cancer risk assessment in women aged 70 and older. *Breast Cancer Res Treat.* 2011;130(1):291-299.
19. Yong LC, Brown CC, Schatzkin A, Schairer C. Prospective study of relative weight and risk of breast cancer: the Breast Cancer Detection Demonstration Project follow-up study, 1979 to 1987-1989. *Am J Epidemiol.* 1996;143(10):985-995.
20. Zmuda JM, Cauley JA, Ljung BM, Bauer DC, Cummings SR, Kuller LH. Bone mass and breast cancer risk in older women: differences by stage at diagnosis. *J Natl Cancer Inst.* 2001;93(12):930-936.
21. Gail MH, Brinton LA, Byar DP, et al. Projecting individualized probabilities of developing breast cancer for white females who are being examined annually. *J Natl Cancer Inst.* 1989;81(24):1879-1886.
22. Schonberg MA, McCarthy EP, York M, Davis RB, Marcantonio ER. Factors influencing elderly women's mammography screening decisions: implications for counseling. *BMC Geriatr.* 2007;7:26.
23. Schonberg MA, Ramanan RA, McCarthy EP, Marcantonio ER. Decision making and counseling around mammography screening for women aged 80 or older. *J Gen Intern Med.* 2006;21(9):979-985.
24. Breast cancer screening in older women. American Geriatrics Society Clinical Practice Committee. *J Am Geriatr Soc.* 2000;48(7):842-844.
25. Fletcher SW, Elmore JG. Clinical practice. Mammographic screening for breast cancer. *N Engl J Med.* 2003;348(17):1672-1680.
26. Lee SJ, Boscardin WJ, Stijacic-Cenzer I, Conell-Price J, O'Brien S, Walter LC. Time lag to benefit after screening for breast and colorectal cancer: meta-analysis of survival data from the United States, Sweden, United Kingdom, and Denmark. *BMJ.* 2013;346:e8441.
27. Walter LC, Covinsky KE. Cancer screening in elderly patients: a framework for individualized decision making. *JAMA.* 2001;285(21):2750-2756.
28. Warner E. Clinical practice. Breast-cancer screening. *N Engl J Med.* 2011;365(11):1025-1032.
29. de Koning HJ, Boer R, Warmerdam PG, Beemsterboer PM, van der Maas PJ. Quantitative interpretation of age-specific mortality reductions from the Swedish breast cancer-screening trials. *J Natl Cancer Inst.* 1995;87(16):1217-1223.
30. Arias E. United States Life Tables, 2008. National Vital Statistics Reports 2012; 61:15 (Table 3).
31. Schonberg MA, Davis RB, McCarthy EP, Marcantonio ER. Index to Predict 5-Year Mortality of Community-Dwelling Adults Aged 65 and Older Using Data from the National Health Interview Survey. *J Gen Intern Med.* 2009. 24(10):1115-1122.
32. Schonberg MA, Davis RB, McCarthy EP, Marcantonio ER. External validation of an index to predict up to 9-year mortality of community-dwelling adults aged 65 and older. *J Am Geriatr Soc.* 2011;59(8):1444-1451.
33. Barratt A, Howard K, Irwig L, Salkeld G, Houssami N. Model of outcomes of screening mammography: information to support informed choices. *BMJ.* 2005;330(7497):936.
34. Carney PA, Miglioretti DL, Yankaskas BC, et al. Individual and combined effects of age, breast density, and hormone replacement therapy use on the accuracy of screening mammography. *Ann Intern Med.* 2003;138(3):168-175.

35. Kerlikowske K, Grady D, Barclay J, Sickles EA, Eaton A, Ernster V. Positive predictive value of screening mammography by age and family history of breast cancer. *JAMA*. 1993;270(20):2444-2450.
36. Nelson HD, Tyne K, Naik A, Bougatsos C, Chan BK, Humphrey L. Screening for breast cancer: an update for the U.S. Preventive Services Task Force. *Ann Intern Med*. 2009;151(10):727-737, W237-742.
37. Schonberg MA, Silliman RA, Marcantonio ER. Weighing the benefits and burdens of mammography screening among women age 80 years or older. *J Clin Oncol*. 2009;27(11):1774-1780.
38. Welch HG, Fisher ES. Diagnostic testing following screening mammography in the elderly. *J Natl Cancer Inst*. 1998;90(18):1389-1392.
39. Keller KL, Staelin D. Effects of quality and quantity of information on decision effectiveness. *J Consum Res* 1987;14: 200-213.
40. Peters E, Diefenbach MA, Hess TM, Vastfjall D. Age differences in dual information-processing modes: implications for cancer decision making. *Cancer*. 2008;113(12 Suppl):3556-3567.
41. Barton MB, Moore S, Polk S, Shtatland E, Elmore JG, Fletcher SW. Increased patient concern after false-positive mammograms: clinician documentation and subsequent ambulatory visits. *J Gen Intern Med*. 2001;16(3):150-156.
42. Brett J, Austoker J. Women who are recalled for further investigation for breast screening: psychological consequences 3 years after recall and factors affecting re-attendance. *J Public Health Med*. 2001;23(4):292-300.
43. Brett J, Bankhead C, Henderson B, Watson E, Austoker J. The psychological impact of mammographic screening. A systematic review. *Psychooncology*. 2005;14(11):917-938.
44. Bruening W, Fontanarosa J, Tipton K, Treadwell JR, Lauenders J, Schoelles K. Systematic review: comparative effectiveness of core-needle and open surgical biopsy to diagnose breast lesions. *Ann Intern Med*. 2010;152(4):238-246.
45. Lowe JB, Balanda KP, Del Mar C, Hawes E. Psychologic distress in women with abnormal findings in mass mammography screening. *Cancer*. 1999;85(5):1114-1118.
46. Breast Cancer Risk Assessment Tool. Download Source Code for the Breast Cancer Risk Calculation Engine. <http://www.cancer.gov/bcrisktool/download-source-code.aspx>. Accessed October, 5, 2013.
47. Badgwell BD, Giordano SH, Duan ZZ, et al. Mammography before diagnosis among women age 80 years and older with breast cancer. *J Clin Oncol*. 2008;26(15):2482-2488.
48. McCarthy EP, Burns RB, Freund KM, et al. Mammography use, breast cancer stage at diagnosis, and survival among older women. *J Am Geriatr Soc*. 2000;48(10):1226-1233.
49. Randolph WM, Goodwin JS, Mahnken JD, Freeman JL. Regular mammography use is associated with elimination of age-related disparities in size and stage of breast cancer at diagnosis. *Ann Intern Med*. 2002;137(10):783-790.
50. Ernster VL, Ballard-Barbash R, Barlow WE, et al. Detection of ductal carcinoma in situ in women undergoing screening mammography. *J Natl Cancer Inst*. 2002;94(20):1546-1554.
51. Ernster VL, Barclay J, Kerlikowske K, Grady D, Henderson C. Incidence of and treatment for ductal carcinoma in situ of the breast. *JAMA*. 1996;275(12):913-918.
52. Biesheuvel C, Barratt A, Howard K, Houssami N, Irwig L. Effects of study methods and biases on estimates of invasive breast cancer overdiagnosis with mammography screening: a systematic review. *Lancet Oncol*. 2007;8(12):1129-1138.

53. Etzioni R, Gulati R, Mallinger L, Mandelblatt J. Influence of study features and methods on overdiagnosis estimates in breast and prostate cancer screening. *Ann Intern Med.* 2013;158(11):831-838.
54. Wu D, Perez A. A limited Review of Over Diagnosis Methods and Long Term Effects in Breast Cancer Screening. *Oncol Rev.* 2011;5(3):143-147.
55. Bleyer A, Welch HG. Effect of three decades of screening mammography on breast-cancer incidence. *N Engl J Med.* 2012;367(21):1998-2005.
56. The benefits and harms of breast cancer screening: an independent review. *Lancet.* 2012;380(9855):1778-1786.
57. Jorgensen KJ, Gotzsche PC. Overdiagnosis in publicly organised mammography screening programmes: systematic review of incidence trends. *BMJ.* 2009;339:b2587.
58. Kalager M, Adami HO, Bretthauer M, Tamimi RM. Overdiagnosis of invasive breast cancer due to mammography screening: results from the Norwegian screening program. *Ann Intern Med.* 2012;156(7):491-499.
59. Morrell S, Barratt A, Irwig L, Howard K, Biesheuvel C, Armstrong B. Estimates of overdiagnosis of invasive breast cancer associated with screening mammography. *Cancer Causes Control.* 2010;21(2):275-282.
60. Diab SG, Elledge RM, Clark GM. Tumor characteristics and clinical outcome of elderly women with breast cancer. *J Natl Cancer Inst.* 2000;92(7):550-556.
61. Schonberg MA, Marcantonio ER, Li D, Silliman RA, Ngo L, McCarthy EP. Breast cancer among the oldest old: tumor characteristics, treatment choices, and survival. *J Clin Oncol.* 2010;28(12):2038-2045.
62. McPherson CP, Swenson KK, Lee MW. The effects of mammographic detection and comorbidity on the survival of older women with breast cancer. *J Am Geriatr Soc.* 2002;50(6):1061-1068.
63. Nystrom L, Andersson I, Bjurstam N, Frisell J, Nordenskjold B, Rutqvist LE. Long-term effects of mammography screening: updated overview of the Swedish randomised trials. *Lancet.* 2002;359(9310):909-919.
64. Nekhlyudov L, Braddock CH, 3rd. An approach to enhance communication about screening mammography in primary care. *J Womens Health (Larchmt).* 2009;18(9):1403-1412.
65. Ackermann RJ, Baralatei FT. Breast cancer screening with mammography in vigorous, average and frail older women. *Annals of Long-Term Care* 2009; 24-31.
66. Independent UKPoBCS. The benefits and harms of breast cancer screening: an independent review. *Lancet.* 2012;380(9855):1778-1786.
67. Kalager M, Zelen M, Langmark F, Adami HO. Effect of screening mammography on breast-cancer mortality in Norway. *N Engl J Med.* 2010;363(13):1203-1210.
68. Gotzsche PC, Nielsen M. Screening for breast cancer with mammography. *Cochrane Database Syst Rev.* 2006(4):CD001877.
69. Gotzsche PC, Nielsen M. Screening for breast cancer with mammography. *Cochrane Database Syst Rev.* 2009(4):CD001877.
70. Tabar L, Fagerberg G, Chen HH, et al. Efficacy of breast cancer screening by age. New results from the Swedish Two-County Trial. *Cancer.* 1995;75(10):2507-2517.

71. Gotzsche PC, Jorgensen KJ. Screening for breast cancer with mammography. *Cochrane Database Syst Rev.* 2013;6:CD001877.
72. LCWK1. Deaths, percent of total deaths, and death rates for the 15 leading causes of death in 5-year age groups, by race and sex: United States, 2010. Pages 31 and 32. [http://www.cdc.gov/nchs/data/dvs/LCWK1\\_2010.pdf](http://www.cdc.gov/nchs/data/dvs/LCWK1_2010.pdf). Accessed October 15, 2013.
73. Leading Cause of Death by Age Group, All Females- United States, 2008. Mortality Tables. [http://www.cdc.gov/nchs/nvss/mortality\\_tables.htm](http://www.cdc.gov/nchs/nvss/mortality_tables.htm). Accessed October 5, 2013.
74. Woloshin S, Schwartz LM, Welch HG. Risk charts: putting cancer in context. *J Natl Cancer Inst.* 2002;94(11):799-804.
75. Woloshin S, Schwartz LM, Welch HG. The risk of death by age, sex, and smoking status in the United States: putting health risks in context. *J Natl Cancer Inst.* 2008;100(12):845-853.
76. Carlson RW, Moench S, Hurria A, et al. NCCN Task Force Report: Breast Cancer in the Older Woman. Journal of the National Comprehensive Cancer Network. 6 (Suppl 4). [www.nccn.org](http://www.nccn.org). Accessed October 5, 2013.
77. Naeim A, Sawhney R, MacLean CH, Sanati H. Quality indicators for the care of breast cancer in vulnerable elders. *J Am Geriatr Soc.* 2007;55 Suppl 2:S258-269.
78. Wildiers H, Kunkler I, Biganzoli L, et al. Management of breast cancer in elderly individuals: recommendations of the International Society of Geriatric Oncology. *Lancet Oncol.* 2007;8(12):1101-1115.
79. National Comprehensive Cancer Network: NCCN clinical Practice Guideline in Oncology: Breast Cancer (Version 2.2011). Fort Washington, PA, National Comprehensive Cancer Network, 2011.
80. Audisio RA. The surgical risk of elderly patients with cancer. *Surg Oncol.* 2004;13(4):169-173.
81. Coates AS, Keshaviah A, Thurlimann B, et al. Five years of letrozole compared with tamoxifen as initial adjuvant therapy for postmenopausal women with endocrine-responsive early breast cancer: update of study BIG 1-98. *J Clin Oncol.* 2007;25(5):486-492.
82. Crew KD, Greenlee H, Capodice J, et al. Prevalence of joint symptoms in postmenopausal women taking aromatase inhibitors for early-stage breast cancer. *J Clin Oncol.* 2007;25(25):3877-3883.
83. Howell A, Cuzick J, Baum M, et al. Results of the ATAC (Arimidex, Tamoxifen, Alone or in Combination) trial after completion of 5 years' adjuvant treatment for breast cancer. *Lancet.* 2005;365(9453):60-62.
84. Buchholz TA. Radiation therapy for early-stage breast cancer after breast-conserving surgery. *N Engl J Med.* 2009;360(1):63-70.
85. Lopez E, Nunez MI, Guerrero MR, et al. Breast cancer acute radiotherapy morbidity evaluated by different scoring systems. *Breast Cancer Res Treat.* 2002;73(2):127-134.
86. Zachariah B, Balducci L, Venkattaramanabalaji GV, Casey L, Greenberg HM, DelRegato JA. Radiotherapy for cancer patients aged 80 and older: a study of effectiveness and side effects. *Int J Radiat Oncol Biol Phys.* 1997;39(5):1125-1129.
87. Muss HB, Berry DA, Cirincione CT, et al. Adjuvant chemotherapy in older women with early-stage breast cancer. *N Engl J Med.* 2009;360(20):2055-2065.

88. Crivellari D, Bonetti M, Castiglione-Gertsch M, et al. Burdens and benefits of adjuvant cyclophosphamide, methotrexate, and fluorouracil and tamoxifen for elderly patients with breast cancer: the International Breast Cancer Study Group Trial VII. *J Clin Oncol*. 2000;18(7):1412-1422.
89. Hurria A, Rosen C, Hudis C, et al. Cognitive function of older patients receiving adjuvant chemotherapy for breast cancer: a pilot prospective longitudinal study. *J Am Geriatr Soc*. 2006;54(6):925-931.

## Before Survey (Patient)

*Thank you for agreeing to participate in this study. I will start the survey now.*

### **Section 1:**

1. (mammo) If your doctor asked you right now to make a choice about whether or not to get a mammogram, on a scale from 1-15 how certain are you about whether or not you would choose to get a mammogram? (1 means you are sure you want a mammogram while 15 means you are sure you do not want a mammogram, if you are unsure please give a number between 1 to 15).

1   2   3   4   5   6   7   8   9   10   11   12   13   15

**Will Get**  
Mammogram

Unsure

**Will Not Get a**  
Mammogram

2. (intend) When do you think you will get your next mammogram?

- <sub>1</sub> Never
- <sub>2</sub> in the next year
- <sub>3</sub> More than 1 year from now but less than 2 years from now
- <sub>4</sub> More than 2 years from now but less than 3 years from now
- <sub>5</sub> More than 3 years from now but less than 5 years from now
- <sub>6</sub> 5 or more years from now

**Section 2: The next few questions are about how you feel about whether or not to get a mammogram. Please say whether you Strongly Agree, Agree, Neither, Disagree, or Strongly Disagree with the statements below.**



3. <sup>(knoption)</sup> I know which options are available to me for getting tested for breast cancer

|                                       |                                       |                                       |                                       |                                       |
|---------------------------------------|---------------------------------------|---------------------------------------|---------------------------------------|---------------------------------------|
| <input type="checkbox"/> <sub>0</sub> | <input type="checkbox"/> <sub>1</sub> | <input type="checkbox"/> <sub>2</sub> | <input type="checkbox"/> <sub>3</sub> | <input type="checkbox"/> <sub>4</sub> |
| Strongly<br>Agree                     | Agree                                 | Neither                               | Disagree                              | Strongly<br>Disagree                  |

4. <sup>(knoben)</sup> I know the benefits of getting a mammogram

|                                       |                                       |                                       |                                       |                                       |
|---------------------------------------|---------------------------------------|---------------------------------------|---------------------------------------|---------------------------------------|
| <input type="checkbox"/> <sub>0</sub> | <input type="checkbox"/> <sub>1</sub> | <input type="checkbox"/> <sub>2</sub> | <input type="checkbox"/> <sub>3</sub> | <input type="checkbox"/> <sub>4</sub> |
| Strongly<br>Agree                     | Agree                                 | Neither                               | Disagree                              | Strongly<br>Disagree                  |

5. <sup>(knodown)</sup> I know the downsides or risks of getting a mammogram

|                                       |                                       |                                       |                                       |                                       |
|---------------------------------------|---------------------------------------|---------------------------------------|---------------------------------------|---------------------------------------|
| <input type="checkbox"/> <sub>0</sub> | <input type="checkbox"/> <sub>1</sub> | <input type="checkbox"/> <sub>2</sub> | <input type="checkbox"/> <sub>3</sub> | <input type="checkbox"/> <sub>4</sub> |
| Strongly<br>Agree                     | Agree                                 | Neither                               | Disagree                              | Strongly<br>Disagree                  |

6. <sup>(clerben)</sup> I am clear about which benefits of getting a mammogram matter most to me

|                                       |                                       |                                       |                                       |                                       |
|---------------------------------------|---------------------------------------|---------------------------------------|---------------------------------------|---------------------------------------|
| <input type="checkbox"/> <sub>0</sub> | <input type="checkbox"/> <sub>1</sub> | <input type="checkbox"/> <sub>2</sub> | <input type="checkbox"/> <sub>3</sub> | <input type="checkbox"/> <sub>4</sub> |
| Strongly<br>Agree                     | Agree                                 | Neither                               | Disagree                              | Strongly<br>Disagree                  |

7. <sup>(clerdown)</sup> I am clear about which downsides of getting a mammogram matter most to me

|                                       |                                       |                                       |                                       |                                       |
|---------------------------------------|---------------------------------------|---------------------------------------|---------------------------------------|---------------------------------------|
| <input type="checkbox"/> <sub>0</sub> | <input type="checkbox"/> <sub>1</sub> | <input type="checkbox"/> <sub>2</sub> | <input type="checkbox"/> <sub>3</sub> | <input type="checkbox"/> <sub>4</sub> |
| Strongly<br>Agree                     | Agree                                 | Neither                               | Disagree                              | Strongly<br>Disagree                  |

8. <sup>(clerimpt)</sup> I am clear about whether the benefits of getting a mammogram are more important to me than the downsides or risks.

|                                       |                                       |                                       |                                       |                                       |
|---------------------------------------|---------------------------------------|---------------------------------------|---------------------------------------|---------------------------------------|
| <input type="checkbox"/> <sub>0</sub> | <input type="checkbox"/> <sub>1</sub> | <input type="checkbox"/> <sub>2</sub> | <input type="checkbox"/> <sub>3</sub> | <input type="checkbox"/> <sub>4</sub> |
| Strongly<br>Agree                     | Agree                                 | Neither                               | Disagree                              | Strongly<br>Disagree                  |

9. <sup>(supp)</sup> I have enough support from others to make a choice about whether or not to get a mammogram

|                                       |                                       |                                       |                                       |                                       |
|---------------------------------------|---------------------------------------|---------------------------------------|---------------------------------------|---------------------------------------|
| <input type="checkbox"/> <sub>0</sub> | <input type="checkbox"/> <sub>1</sub> | <input type="checkbox"/> <sub>2</sub> | <input type="checkbox"/> <sub>3</sub> | <input type="checkbox"/> <sub>4</sub> |
| Strongly<br>Agree                     | Agree                                 | Neither                               | Disagree                              | Strongly<br>Disagree                  |

10. (woutpres) I am choosing without pressure from others about whether or not to get a mammogram

|                                       |                                       |                                       |                                       |                                       |
|---------------------------------------|---------------------------------------|---------------------------------------|---------------------------------------|---------------------------------------|
| <input type="checkbox"/> <sub>0</sub> | <input type="checkbox"/> <sub>1</sub> | <input type="checkbox"/> <sub>2</sub> | <input type="checkbox"/> <sub>3</sub> | <input type="checkbox"/> <sub>4</sub> |
| Strongly<br>Agree                     | Agree                                 | Neither                               | Disagree                              | Strongly<br>Disagree                  |

11. (advice) I have enough advice to make a choice about getting a mammogram or not

|                                       |                                       |                                       |                                       |                                       |
|---------------------------------------|---------------------------------------|---------------------------------------|---------------------------------------|---------------------------------------|
| <input type="checkbox"/> <sub>0</sub> | <input type="checkbox"/> <sub>1</sub> | <input type="checkbox"/> <sub>2</sub> | <input type="checkbox"/> <sub>3</sub> | <input type="checkbox"/> <sub>4</sub> |
| Strongly<br>Agree                     | Agree                                 | Neither                               | Disagree                              | Strongly<br>Disagree                  |

12. (clerbes) I am clear about what is the best choice for me

|                                       |                                       |                                       |                                       |                                       |
|---------------------------------------|---------------------------------------|---------------------------------------|---------------------------------------|---------------------------------------|
| <input type="checkbox"/> <sub>0</sub> | <input type="checkbox"/> <sub>1</sub> | <input type="checkbox"/> <sub>2</sub> | <input type="checkbox"/> <sub>3</sub> | <input type="checkbox"/> <sub>4</sub> |
| Strongly<br>Agree                     | Agree                                 | Neither                               | Disagree                              | Strongly<br>Disagree                  |

13. (sure) I feel sure about what to choose

|                                       |                                       |                                       |                                       |                                       |
|---------------------------------------|---------------------------------------|---------------------------------------|---------------------------------------|---------------------------------------|
| <input type="checkbox"/> <sub>0</sub> | <input type="checkbox"/> <sub>1</sub> | <input type="checkbox"/> <sub>2</sub> | <input type="checkbox"/> <sub>3</sub> | <input type="checkbox"/> <sub>4</sub> |
| Strongly<br>Agree                     | Agree                                 | Neither                               | Disagree                              | Strongly<br>Disagree                  |

14. (easy) This decision is easy for me to make

|                                       |                                       |                                       |                                       |                                       |
|---------------------------------------|---------------------------------------|---------------------------------------|---------------------------------------|---------------------------------------|
| <input type="checkbox"/> <sub>0</sub> | <input type="checkbox"/> <sub>1</sub> | <input type="checkbox"/> <sub>2</sub> | <input type="checkbox"/> <sub>3</sub> | <input type="checkbox"/> <sub>4</sub> |
| Strongly<br>Agree                     | Agree                                 | Neither                               | Disagree                              | Strongly<br>Disagree                  |

15. (inform) I feel I have made an informed choice about whether or not to get a mamogram

|                                       |                                       |                                       |                                       |                                       |
|---------------------------------------|---------------------------------------|---------------------------------------|---------------------------------------|---------------------------------------|
| <input type="checkbox"/> <sub>0</sub> | <input type="checkbox"/> <sub>1</sub> | <input type="checkbox"/> <sub>2</sub> | <input type="checkbox"/> <sub>3</sub> | <input type="checkbox"/> <sub>4</sub> |
| Strongly<br>Agree                     | Agree                                 | Neither                               | Disagree                              | Strongly<br>Disagree                  |

16. (decimp) My decision shows what is important to me

|                                       |                                       |                                       |                                       |                                       |
|---------------------------------------|---------------------------------------|---------------------------------------|---------------------------------------|---------------------------------------|
| <input type="checkbox"/> <sub>0</sub> | <input type="checkbox"/> <sub>1</sub> | <input type="checkbox"/> <sub>2</sub> | <input type="checkbox"/> <sub>3</sub> | <input type="checkbox"/> <sub>4</sub> |
| Strongly Agree                        | Agree                                 | Neither                               | Disagree                              | Strongly Disagree                     |

17. (stikdec) I expect to stick with my decision whether or not to get a mammogram

|                                       |                                       |                                       |                                       |                                       |
|---------------------------------------|---------------------------------------|---------------------------------------|---------------------------------------|---------------------------------------|
| <input type="checkbox"/> <sub>0</sub> | <input type="checkbox"/> <sub>1</sub> | <input type="checkbox"/> <sub>2</sub> | <input type="checkbox"/> <sub>3</sub> | <input type="checkbox"/> <sub>4</sub> |
| Strongly Agree                        | Agree                                 | Neither                               | Disagree                              | Strongly Disagree                     |

18. (satis) I am satisfied with my decision

|                                       |                                       |                                       |                                       |                                       |
|---------------------------------------|---------------------------------------|---------------------------------------|---------------------------------------|---------------------------------------|
| <input type="checkbox"/> <sub>0</sub> | <input type="checkbox"/> <sub>1</sub> | <input type="checkbox"/> <sub>2</sub> | <input type="checkbox"/> <sub>3</sub> | <input type="checkbox"/> <sub>4</sub> |
| Strongly Agree                        | Agree                                 | Neither                               | Disagree                              | Strongly Disagree                     |

19. (anxmam) I am anxious about getting a mammogram.

|                                       |                                       |                                       |                                       |                                       |
|---------------------------------------|---------------------------------------|---------------------------------------|---------------------------------------|---------------------------------------|
| <input type="checkbox"/> <sub>5</sub> | <input type="checkbox"/> <sub>4</sub> | <input type="checkbox"/> <sub>3</sub> | <input type="checkbox"/> <sub>2</sub> | <input type="checkbox"/> <sub>1</sub> |
| Strongly Agree                        | Agree                                 | Neither                               | Disagree                              | Strongly Disagree                     |

20. (pres) I feel pressured to get a mammogram.

|                                       |                                       |                                       |                                       |                                       |
|---------------------------------------|---------------------------------------|---------------------------------------|---------------------------------------|---------------------------------------|
| <input type="checkbox"/> <sub>5</sub> | <input type="checkbox"/> <sub>4</sub> | <input type="checkbox"/> <sub>3</sub> | <input type="checkbox"/> <sub>2</sub> | <input type="checkbox"/> <sub>1</sub> |
| Strongly Agree                        | Agree                                 | Neither                               | Disagree                              | Strongly Disagree                     |

**Section 3: The next few questions are about how breast cancer affects women aged 75 and older.**

21. (knowled) In general, would you say that your knowledge about breast cancer among women aged 75 and older is:

- <sub>5</sub> Excellent
- <sub>4</sub> Very good
- <sub>3</sub> Good
- <sub>2</sub> Fair
- <sub>1</sub> Poor

**The next few questions may be hard. Please answer the questions below to the best of your ability. Even if you are not sure, please guess.**

22. (havdonot) How many women aged 75 and older out of 1,000 will be told they have breast cancer in the next five years if they DO NOT get a mammogram?

- <sub>1</sub> 0-4 out of 1,000 women aged 75 or older
- <sub>2</sub> 5-9 out of 1,000 women aged 75 or older
- <sub>3</sub> 10-19 out of 1,000 women aged 75 or older
- <sub>4</sub> 20-29 out of 1,000 women aged 75 or older
- <sub>5</sub> 30-49 out of 1,000 women aged 75 or older
- <sub>6</sub> 50-100 out of 1,000 women aged 75 or older
- 7 \_\_\_\_\_ (open ended, write down number)

23. (havdo) How many women aged 75 and older out of 1,000 will be told they have breast cancer in the next five years if they DO get a mammogram?

- <sub>1</sub> 0-4 out of 1,000 women aged 75 or older
- <sub>2</sub> 5-9 out of 1,000 women aged 75 or older
- <sub>3</sub> 10-19 out of 1,000 women aged 75 or older
- <sub>4</sub> 20-29 out of 1,000 women aged 75 or older
- <sub>5</sub> 30-49 out of 1,000 women aged 75 or older
- <sub>6</sub> 50-100 out of 1,000 women aged 75 or older
- 7 \_\_\_\_\_ (open ended, write down number)

24. (diedonot) How many women aged 75 and older out of 1,000 will die from breast cancer in the next five years if they DO NOT get a mammogram?

- <sub>1</sub> 0-4 out of 1,000 women aged 75 or older
- <sub>2</sub> 5-9 out of 1,000 women aged 75 or older
- <sub>3</sub> 10-19 out of 1,000 women aged 75 or older
- <sub>4</sub> 20-29 out of 1,000 women aged 75 or older

- <sub>5</sub> 30-49 out of 1,000 women aged 75 or older
- <sub>6</sub> 50-100 out of 1,000 women aged 75 or older
- 7 \_\_\_\_\_ (open ended, write down number)

25. (diedo) How many women aged 75 and older out of 1,000 will die of breast cancer in the next five years if they DO get a mammogram?

- <sub>1</sub> 0-4 out of 1,000 women aged 75 or older
- <sub>2</sub> 5-9 out of 1,000 women aged 75 or older
- <sub>3</sub> 10-19 out of 1,000 women aged 75 or older
- <sub>4</sub> 20-29 out of 1,000 women aged 75 or older
- <sub>5</sub> 30-49 out of 1,000 women aged 75 or older
- <sub>6</sub> 50-100 out of 1,000 women aged 75 or older
- 7 \_\_\_\_\_ (open ended, write down number?)

26. (abnobrc) How many women aged 75 or older out of 1,000 will have a “false alarm” in the next 5 years (their mammogram is abnormal but additional tests do not show breast cancer)?

- <sub>1</sub> 0-4 out of 1,000 women aged 75 or older
- <sub>2</sub> 5-9 out of 1,000 women aged 75 or older
- <sub>3</sub> 10-19 out of 1,000 women aged 75 or older
- <sub>4</sub> 20-29 out of 1,000 women aged 75 or older
- <sub>5</sub> 30-49 out of 1,000 women aged 75 or older
- <sub>6</sub> 50-100 out of 1,000 women aged 75 or older
- 7 \_\_\_\_\_ (open ended, write down number?)

## KNOWLEDGE QUESTIONS

27. (diagbrc) Who is more likely to be diagnosed with breast cancer?

- <sub>1</sub> Women who get mammograms
- <sub>2</sub> Women who do NOT get mammograms
- <sub>3</sub> There is almost no difference

28. (diebrc) Who is more likely to die from breast cancer?

- <sub>1</sub> Women who get mammograms
- <sub>2</sub> Women who do NOT get mammograms
- <sub>3</sub> There is almost no difference

***The next few questions are True or False Questions. Please state whether each of the following statements is true or false (your best guess is fine).***

29. (benfind) The benefit of getting a mammogram is finding and treating a breast cancer at an early stage that would have otherwise harmed a woman.

- <sub>1</sub> True
- <sub>2</sub> False

30. (prevbc) Getting a mammogram will prevent an older woman from getting breast cancer.

- <sub>1</sub> True
- <sub>2</sub> False

31. (abhavbrc) Most women who have an abnormal mammogram have breast cancer.

- <sub>1</sub> True
- <sub>2</sub> False

32. (gretrisk) Women aged 75 or older have a higher chance of getting breast cancer than younger women.

- <sub>1</sub> True
- <sub>2</sub> False

33. (heart) More women aged 75 or older die of heart disease than breast cancer.

- <sub>1</sub> True
- <sub>2</sub> False

34. (otherprob) Your other health problems affect whether or not you should get a mammogram.

<sub>1</sub> True                      <sub>2</sub> False

35. (noshow) Some breast cancers found by a mammogram would never have shown up or caused problems in a woman's lifetime.

<sub>1</sub> True                      <sub>2</sub> False

36. (chemo) Most women aged 75 or older with breast cancer are treated with chemotherapy.

<sub>1</sub> True                      <sub>2</sub> False

### Section 4: The next questions ask about your ability with numbers -

37. (frac) How good are you at working with fractions?

<sub>1</sub>                      <sub>2</sub>                      <sub>3</sub>                      <sub>4</sub>                      <sub>5</sub>                      <sub>6</sub>

Not at all              A little bit              Somewhat              Good                      Very                      Extremely  
Good                      Good                      Good                      Good                      Good                      Good

38. (percent) How good are you at working with percentages?

<sub>1</sub>                      <sub>2</sub>                      <sub>3</sub>                      <sub>4</sub>                      <sub>5</sub>                      <sub>6</sub>

Not at all              A little bit              Somewhat              Good                      Very                      Extremely  
Good                      Good                      Good                      Good                      Good                      Good

39. (calc15) How good are you at calculating a 15% tip?

<sub>1</sub>                      <sub>2</sub>                      <sub>3</sub>                      <sub>4</sub>                      <sub>5</sub>                      <sub>6</sub>

Not at all              A little bit              Somewhat              Good                      Very                      Extremely  
Good                      Good                      Good                      Good                      Good                      Good

40. (calc25) How good are you at figuring out how much a shirt will cost if it is 25% off?

<sub>1</sub>                      <sub>2</sub>                      <sub>3</sub>                      <sub>4</sub>                      <sub>5</sub>                      <sub>6</sub>

Not at all              A little bit              Somewhat              Good                      Very                      Extremely  
Good                      Good                      Good                      Good                      Good                      Good

41. (newsnum) When reading the newspaper, how helpful do you find tables and graphs that are part of a story?

|                                       |                                       |                                       |                                       |                                       |                                       |
|---------------------------------------|---------------------------------------|---------------------------------------|---------------------------------------|---------------------------------------|---------------------------------------|
| <input type="checkbox"/> <sub>1</sub> | <input type="checkbox"/> <sub>2</sub> | <input type="checkbox"/> <sub>3</sub> | <input type="checkbox"/> <sub>4</sub> | <input type="checkbox"/> <sub>5</sub> | <input type="checkbox"/> <sub>6</sub> |
| Not at all helpful                    | A little bit helpful                  | Somewhat helpful                      | Quite helpful                         | Very helpful                          | Extremely helpful                     |

42. (chance) When people tell you the chance of something happening, do you prefer that they use words (“it rarely happens”) or numbers (“there’s a 1% chance”)?

|                                       |                                       |                                       |                                       |                                       |                                       |
|---------------------------------------|---------------------------------------|---------------------------------------|---------------------------------------|---------------------------------------|---------------------------------------|
| <input type="checkbox"/> <sub>1</sub> | <input type="checkbox"/> <sub>2</sub> | <input type="checkbox"/> <sub>3</sub> | <input type="checkbox"/> <sub>4</sub> | <input type="checkbox"/> <sub>5</sub> | <input type="checkbox"/> <sub>6</sub> |
| Always prefer words                   | Most of the time prefer words         | Sometimes prefer words                | Sometimes prefer numbers              | Most of the time prefer numbers       | Always prefer numbers                 |

43. (chancerain) When you hear a weather forecast, do you prefer predictions using percentages (“there will be a 20% chance of rain today”) or predictions using only words (“there is a small chance of rain today”)?

|                                       |                                       |                                       |                                       |                                       |                                       |
|---------------------------------------|---------------------------------------|---------------------------------------|---------------------------------------|---------------------------------------|---------------------------------------|
| <input type="checkbox"/> <sub>1</sub> | <input type="checkbox"/> <sub>2</sub> | <input type="checkbox"/> <sub>3</sub> | <input type="checkbox"/> <sub>4</sub> | <input type="checkbox"/> <sub>5</sub> | <input type="checkbox"/> <sub>6</sub> |
| Always prefer percentages             | Most of the time prefer percentages   | Sometimes prefer percentages          | Sometimes prefer words                | Most of the time prefer words         | Always prefer words                   |

44. (numuse) How often do you find numerical information to be useful?

|                                       |                                       |                                       |                                       |                                       |                                       |
|---------------------------------------|---------------------------------------|---------------------------------------|---------------------------------------|---------------------------------------|---------------------------------------|
| <input type="checkbox"/> <sub>1</sub> | <input type="checkbox"/> <sub>2</sub> | <input type="checkbox"/> <sub>3</sub> | <input type="checkbox"/> <sub>4</sub> | <input type="checkbox"/> <sub>5</sub> | <input type="checkbox"/> <sub>6</sub> |
| Never                                 | A little                              | Somewhat Often                        | Quite Often                           | Very Often                            | Extremely Often                       |

45. (decmak) The next question asks about your preferred role in decision-making around mammography screening. Please let me read all 5 choices and then select which one best describes your preferred role.

- <sub>1</sub> I prefer to make the final decision about whether or not to get a mammogram.
- <sub>2</sub> I prefer to make the final decision about whether or not to get a mammogram after seriously considering my doctor’s opinion.
- <sub>3</sub> I prefer that my doctor and I share responsibility for deciding whether or not to get a mammogram is best for me.
- <sub>4</sub> I prefer that my doctor make the final decision about whether or not I should get a mammogram, but seriously considers my opinion.



- <sub>5</sub> I would prefer to leave all decisions regarding mammography to my doctor.
- <sub>98</sub> Refused
- <sub>99</sub> Don't know

46. (risk) Do you think you are at above average, average, or below average chances of getting breast cancer compared to other women your age?

- <sub>0</sub> Above average
- <sub>1</sub> Average
- <sub>2</sub> Below average
- <sub>98</sub> Refuse
- <sub>99</sub> Don't know

For these next questions, please let me know how you feel right now about getting a mammogram.

47. (pleasant) For you, getting a mammogram is:

- <sub>0</sub> Pleasant
- <sub>1</sub> Somewhat Pleasant
- <sub>2</sub> Neither
- <sub>3</sub> Somewhat Unpleasant
- <sub>4</sub> Unpleasant

48. (impt) For you getting a mammogram is:

- <sub>0</sub> Extremely important to you
- <sub>1</sub> Very important to you
- <sub>2</sub> Somewhat important to you
- <sub>3</sub> A little important to you
- <sub>4</sub> Not at all important to you

49. (badthing) For you getting a mammogram is:

- <sub>0</sub> A good thing
- <sub>1</sub> A somewhat good thing
- <sub>2</sub> An OK thing
- <sub>3</sub> A somewhat bad thing
- <sub>4</sub> A bad thing

50. (harmben) For you getting a mammogram is:

- <sub>0</sub> Beneficial
- <sub>1</sub> Somewhat beneficial
- <sub>2</sub> Neither harmful or beneficial
- <sub>3</sub> Somewhat harmful
- <sub>4</sub> Harmful

## **Now, I am going to ask you some background information**

51. (hxdcis) Do you have a history of Ductal Carcinoma in Situ or DCIS?

- <sub>0</sub> No
- <sub>1</sub> Yes

52. (hxlcis) Do you have a history of Lobular Carcinoma in Situ or LCIS?

- <sub>0</sub> No
- <sub>1</sub> Yes

53. (agefp) How old were you at the time of your first period?\_\_\_\_\_

54. (birth) Have you given birth to a child?

- <sub>0</sub> No (skip to 56)
- <sub>1</sub> Yes

55. (agefb) How old were you at the time of your first birth?\_\_\_\_\_

56. (famhxbc) Do you have a family history of breast cancer?

<sub>0</sub> No (skip to 60)

<sub>1</sub> Yes

57. (mombc) Did your mother have breast cancer?

<sub>0</sub> No

<sub>1</sub> Yes

58. (sisbc) Did your sister have breast cancer: (if so, how many sisters had breast cancer?)

0 1 2 3 4 \_\_\_\_

59. (daubc) Did your daughter have breast cancer: (if so, how many daughters had breast cancer?)

0 1 2 3 4 \_\_\_\_

60. (brbx) Have you ever had a breast biopsy?

<sub>0</sub> No (Skip to 59)

<sub>1</sub> Yes

61. (rebrbx) Did your breast biopsy show atypical cells?

<sub>0</sub> No, it was completely normal

<sub>1</sub> Yes, it showed atypical cells

<sub>2</sub> Yes, it showed ductal carcinoma in situ

<sub>3</sub> Yes, it showed lobular carcinoma in situ

<sub>4</sub> Yes, it showed \_\_\_\_\_

<sub>99</sub> Don't know

62. (edu) What is the highest level of school you have completed or the highest degree you have received?

High school or less, no diploma<sup>0</sup>  
\*\*\*Ask if patient would have any trouble reading through the pamphlet.

High school graduate<sup>1</sup>

GED or equivalent<sup>2</sup>

Some college or an Associate's degree<sup>3</sup>

Bachelor's degree (i.e., BA, AB, BS, BBA)<sup>4</sup>

- Master's degree (i.e., MA, MS, MEngineering, MEducation, MBA)<sup>5</sup>
- Professional School degree (MD, DDS, DVM, JD)<sup>6</sup>
- Nursing degree
- Doctoral degree (PhD, EdD, ScD)<sup>7</sup>
- Don't know<sup>99</sup>

63. <sup>(income)</sup> Of these income groups can you tell me which best represents your total combined household income during the last year?

- <\$20,000<sup>0</sup>
- \$20,000-\$35,000<sup>1</sup>
- \$36,000-\$65,000<sup>2</sup>
- \$66,000-\$100,000<sup>3</sup>
- >\$100,000<sup>4</sup>
- Don't know<sup>99</sup>

64. <sup>(maritalst)</sup> How would you define your marital status?

- Single (never married)<sup>0</sup>
- Currently married or living as married<sup>1</sup>
- Divorced<sup>2</sup>
- Separated<sup>3</sup>
- Widowed<sup>4</sup>
- Don't know<sup>99</sup>

65. <sup>(live)</sup> Do you live alone or with others?

- I live alone<sup>0</sup>
- I live with others<sup>1</sup>

66. <sup>(hispan)</sup> Do you consider yourself to be Hispanic or Latino?

- No, I am not Hispanic or Latino<sup>0</sup>

- Yes, I am Hispanic or Latino <sup>1</sup>
- Don't know <sup>99</sup>

67. (race) Which of the following racial groups do you most identify with?

- White or Caucasian <sup>0</sup>
- Black or African American <sup>1</sup>
- Asian <sup>2</sup>
- American Indian or Alaska Native <sup>3</sup>
- Native Hawaiian or other Pacific Islander <sup>4</sup>
- Other <sup>5</sup>
- Don't know <sup>99</sup>

**Thank you for completing this survey! You will receive \$25 for participating in this study.**

-----

**(To be done before starting the interview)**

**Orientation-Memory-Concentration Test Short Blessed Test (SDT)**

68. (mem) I am going to do a quick memory test.

| Question                                                                                                                                        | Maximum Error | Score X | Weight        |
|-------------------------------------------------------------------------------------------------------------------------------------------------|---------------|---------|---------------|
| What year is it now?                                                                                                                            | 1             | ___ x 4 | = ___         |
| What month is it now?<br>Repeat this phrase and I will ask you to remember it and tell it to me later:<br>John Brown, 42 Market Street, Chicago | 1             | ___ x 3 | = ___         |
| About what time is it? (within one hour)                                                                                                        | 1             | ___ x 3 | = ___         |
| Count backwards 20 to 1                                                                                                                         | 2             | ___ x 2 | = ___         |
| Say the months in reverse order                                                                                                                 | 2             | ___ x 2 | = ___         |
| Repeat the phrase just given                                                                                                                    | 5             | ___ x 2 | = ___         |
| <b>Total error score =</b>                                                                                                                      |               |         | <b>___/28</b> |

**THIS NEXT PART is to be completed the day of the interview**

I want to hear you read as many words as you can from this list. Begin with the first word and read aloud. When you come to a word you cannot read, do the best you can or say, 'blank' and go onto the next word.

|             |                          |
|-------------|--------------------------|
| Menopause   | <input type="checkbox"/> |
| Antibiotics | <input type="checkbox"/> |
| Exercise    | <input type="checkbox"/> |
| Jaundice    | <input type="checkbox"/> |
| Rectal      | <input type="checkbox"/> |
| Anemia      | <input type="checkbox"/> |
| Behavior    | <input type="checkbox"/> |

69. (realm) **REALM-SF Form** \_\_\_\_\_

**Health Quiz: (Fill in patient's responses on DA)**

70. (agehs) How old are you? \_\_\_\_\_

71. (weight) How much do you weigh? \_\_\_\_\_

72. (height) How tall are you? \_\_\_\_\_

73. (health) Would you say your health is:

<sub>0</sub> Excellent/Very Good

<sub>1</sub> Good

<sub>2</sub> Fair/Poor

74. (copd) Have you ever been told by a doctor or health professional that you had emphysema or chronic bronchitis or COPD?

<sub>0</sub> No

<sub>2</sub> Yes

75. (cancer) Have you ever been told by a doctor or health professional that you had cancer? (do not include skin cancer unless it was melanoma)

<sub>0</sub> No

<sub>2</sub> Yes

76. (diab) Have you ever been told by a doctor or health professional that you had diabetes?

<sub>0</sub> No

<sub>2</sub> Yes

77. Because of a physical, mental or emotional problem, do you need help from other people with routine needs? These include everyday household chores, doing necessary business, shopping or getting around for other purposes?

<sub>0</sub> No

<sub>2</sub> Yes

78. (walk) By yourself and without using any special equipment, how difficult is it for you to walk a quarter of a mile (about 3 city blocks)?

<sub>0</sub> Not at all difficult

<sub>3</sub> A little difficult to very difficult/Can't do at all/do not do/can only do with a cane or walker

79. (cigar) Which best describes your cigarette use?

<sub>0</sub> Never smoked or smoked less than 100 cigarettes in your life

<sub>1</sub> Former smoker

<sub>3</sub> Current smoker

80. (hosp) During the past 12 months, how many times were you hospitalized overnight?

<sub>0</sub> None

<sub>1</sub> Once

<sub>3</sub> Twice or more

81. (hs) Total points : \_\_\_\_\_



## After Survey (Patient)

Study ID: \_\_\_\_\_

*Thank you for agreeing to participate in this study. Now that you have reviewed the education pamphlet there are a few questions that we would like you to answer.*

### Section 1:

1. (mammo2) Now that you have had a chance to think about whether or not you want to get a mammogram what have you decided? (this should be your opinion and not what you think your doctor wants you to do) After reading this information, some people change their mind and others do not. From, 1 to 15 how certain are you that you will get a mammogram. 1 means you are sure you will get a mammogram and 15 means you are sure you will not get a mammogram. If you are not sure please give a number between 1 and 15.

1    2    3    4    5    6    7    8    9    10    11    12    13    15

**Will Get**  
Mammogram

Unsure

**Will Not Get a**  
Mammogram

2. (intend2) When do you think you will get your next mammogram?

- <sub>0</sub> Never
- <sub>1</sub> In the next year
- <sub>2</sub> More than 1 year from now but less than 2 years from now
- <sub>3</sub> More than 2 years from now but less than 3 years from now
- <sub>4</sub> More than 3 years from now but less than 5 years from now
- <sub>5</sub> 5 or more years from now

3. (changmamo) Did reading the educational tool change how often you plan to go for mammograms?

- <sub>0</sub> No
- <sub>1</sub> Yes, I now plan to go for a mammogram MORE often
- <sub>2</sub> Yes, I now plan to go for a mammogram LESS often

4. (docmamo) What do you think your doctor wants you to do in terms of mammograms on a scale from 1 to 15? 1 means you are sure that your doctor wants you to get a mammogram and 15 means that you are sure that your doctor does not want you to get a mammogram. If you are not sure what your doctor wants you to do please give a number between 1 and 15.

1 2 3 4 5 6 7 8 9 10 11 12 13 15

Will Get  
Mammogram

Unsure

Will Not Get a  
Mammogram

5. (talkdoc) Did you talk to your primary care doctor about getting a mammogram?

<sub>1</sub> YES

<sub>2</sub> NO

**Section 2: The next few questions are about how you feel about whether or not to get a mammogram. Please say whether you Strongly Agree, Agree, Neither, Disagree, or Strongly Disagree with the statements below.**

6. (knoption2) I know what options are available to me for getting tested for breast cancer.

<sub>0</sub> Strongly Agree      <sub>1</sub> Agree      <sub>2</sub> Neither      <sub>3</sub> Disagree      <sub>4</sub> Strongly Disagree

7. (knoben2) I know the benefits of getting a mammogram.

<sub>0</sub> Strongly Agree      <sub>1</sub> Agree      <sub>2</sub> Neither      <sub>3</sub> Disagree      <sub>4</sub> Strongly Disagree

8. (knodown2) I know the downsides or risks of getting a mammogram.

<sub>0</sub> Strongly Agree      <sub>1</sub> Agree      <sub>2</sub> Neither      <sub>3</sub> Disagree      <sub>4</sub> Strongly Disagree

9. (clerben2) I am clear about which benefits of getting a mammogram matter most to me.

|                                       |                                       |                                       |                                       |                                       |
|---------------------------------------|---------------------------------------|---------------------------------------|---------------------------------------|---------------------------------------|
| <input type="checkbox"/> <sub>0</sub> | <input type="checkbox"/> <sub>1</sub> | <input type="checkbox"/> <sub>2</sub> | <input type="checkbox"/> <sub>3</sub> | <input type="checkbox"/> <sub>4</sub> |
| Strongly<br>Agree                     | Agree                                 | Neither                               | Disagree                              | Strongly<br>Disagree                  |

10. (clerdown2) I am clear about which downsides or risks of getting a mammogram matter most to me.

|                                       |                                       |                                       |                                       |                                       |
|---------------------------------------|---------------------------------------|---------------------------------------|---------------------------------------|---------------------------------------|
| <input type="checkbox"/> <sub>0</sub> | <input type="checkbox"/> <sub>1</sub> | <input type="checkbox"/> <sub>2</sub> | <input type="checkbox"/> <sub>3</sub> | <input type="checkbox"/> <sub>4</sub> |
| Strongly<br>Agree                     | Agree                                 | Neither                               | Disagree                              | Strongly<br>Disagree                  |

11. (clerimpt2) I am clear about whether the benefits of getting a mammogram are more important to me than the downsides or risks.

|                                       |                                       |                                       |                                       |                                       |
|---------------------------------------|---------------------------------------|---------------------------------------|---------------------------------------|---------------------------------------|
| <input type="checkbox"/> <sub>0</sub> | <input type="checkbox"/> <sub>1</sub> | <input type="checkbox"/> <sub>2</sub> | <input type="checkbox"/> <sub>3</sub> | <input type="checkbox"/> <sub>4</sub> |
| Strongly<br>Agree                     | Agree                                 | Neither                               | Disagree                              | Strongly<br>Disagree                  |

12. (supp2) I have enough support from others to make a choice whether or not to get a mammogram.

|                                       |                                       |                                       |                                       |                                       |
|---------------------------------------|---------------------------------------|---------------------------------------|---------------------------------------|---------------------------------------|
| <input type="checkbox"/> <sub>0</sub> | <input type="checkbox"/> <sub>1</sub> | <input type="checkbox"/> <sub>2</sub> | <input type="checkbox"/> <sub>3</sub> | <input type="checkbox"/> <sub>4</sub> |
| Strongly<br>Agree                     | Agree                                 | Neither                               | Disagree                              | Strongly<br>Disagree                  |

13. (woutpres2) I am choosing without pressure from others about whether or not to get a mammogram.

|                                       |                                       |                                       |                                       |                                       |
|---------------------------------------|---------------------------------------|---------------------------------------|---------------------------------------|---------------------------------------|
| <input type="checkbox"/> <sub>0</sub> | <input type="checkbox"/> <sub>1</sub> | <input type="checkbox"/> <sub>2</sub> | <input type="checkbox"/> <sub>3</sub> | <input type="checkbox"/> <sub>4</sub> |
| Strongly<br>Agree                     | Agree                                 | Neither                               | Disagree                              | Strongly<br>Disagree                  |

14. (advice2) I have enough advice to make a choice about whether or not to get a mammogram.

|                                       |                                       |                                       |                                       |                                       |
|---------------------------------------|---------------------------------------|---------------------------------------|---------------------------------------|---------------------------------------|
| <input type="checkbox"/> <sub>0</sub> | <input type="checkbox"/> <sub>1</sub> | <input type="checkbox"/> <sub>2</sub> | <input type="checkbox"/> <sub>3</sub> | <input type="checkbox"/> <sub>4</sub> |
| Strongly<br>Agree                     | Agree                                 | Neither                               | Disagree                              | Strongly<br>Disagree                  |

15. (clerbes2) I am clear about the best choice for me

|                                       |                                       |                                       |                                       |                                       |
|---------------------------------------|---------------------------------------|---------------------------------------|---------------------------------------|---------------------------------------|
| <input type="checkbox"/> <sub>0</sub> | <input type="checkbox"/> <sub>1</sub> | <input type="checkbox"/> <sub>2</sub> | <input type="checkbox"/> <sub>3</sub> | <input type="checkbox"/> <sub>4</sub> |
| Strongly<br>Agree                     | Agree                                 | Neither                               | Disagree                              | Strongly<br>Disagree                  |

16. (anxmama) I am anxious about getting a mammogram.

|                                       |                                       |                                       |                                       |                                       |
|---------------------------------------|---------------------------------------|---------------------------------------|---------------------------------------|---------------------------------------|
| <input type="checkbox"/> <sub>0</sub> | <input type="checkbox"/> <sub>1</sub> | <input type="checkbox"/> <sub>2</sub> | <input type="checkbox"/> <sub>3</sub> | <input type="checkbox"/> <sub>4</sub> |
| Strongly<br>Agree                     | Agree                                 | Neither                               | Disagree                              | Strongly<br>Disagree                  |

17. (presa) I feel pressured to get a mammogram.

|                                       |                                       |                                       |                                       |                                       |
|---------------------------------------|---------------------------------------|---------------------------------------|---------------------------------------|---------------------------------------|
| <input type="checkbox"/> <sub>0</sub> | <input type="checkbox"/> <sub>1</sub> | <input type="checkbox"/> <sub>2</sub> | <input type="checkbox"/> <sub>3</sub> | <input type="checkbox"/> <sub>4</sub> |
| Strongly<br>Agree                     | Agree                                 | Neither                               | Disagree                              | Strongly<br>Disagree                  |

18. (sure2) I feel sure about what to choose in terms of whether or not to get a mammogram.

|                                       |                                       |                                       |                                       |                                       |
|---------------------------------------|---------------------------------------|---------------------------------------|---------------------------------------|---------------------------------------|
| <input type="checkbox"/> <sub>0</sub> | <input type="checkbox"/> <sub>1</sub> | <input type="checkbox"/> <sub>2</sub> | <input type="checkbox"/> <sub>3</sub> | <input type="checkbox"/> <sub>4</sub> |
| Strongly<br>Agree                     | Agree                                 | Neither                               | Disagree                              | Strongly<br>Disagree                  |

19. (easy2) This decision is easy for me to make.

|                                       |                                       |                                       |                                       |                                       |
|---------------------------------------|---------------------------------------|---------------------------------------|---------------------------------------|---------------------------------------|
| <input type="checkbox"/> <sub>0</sub> | <input type="checkbox"/> <sub>1</sub> | <input type="checkbox"/> <sub>2</sub> | <input type="checkbox"/> <sub>3</sub> | <input type="checkbox"/> <sub>4</sub> |
| Strongly<br>Agree                     | Agree                                 | Neither                               | Disagree                              | Strongly<br>Disagree                  |

20. (inform2) I feel I have made an informed choice whether or not to get a mammogram.

|                                       |                                       |                                       |                                       |                                       |
|---------------------------------------|---------------------------------------|---------------------------------------|---------------------------------------|---------------------------------------|
| <input type="checkbox"/> <sub>0</sub> | <input type="checkbox"/> <sub>1</sub> | <input type="checkbox"/> <sub>2</sub> | <input type="checkbox"/> <sub>3</sub> | <input type="checkbox"/> <sub>4</sub> |
| Strongly<br>Agree                     | Agree                                 | Neither                               | Disagree                              | Strongly<br>Disagree                  |

21. (decimp2) My decision about whether or not to get a mammogram shows what is important to me

|                                       |                                       |                                       |                                       |                                       |
|---------------------------------------|---------------------------------------|---------------------------------------|---------------------------------------|---------------------------------------|
| <input type="checkbox"/> <sub>0</sub> | <input type="checkbox"/> <sub>1</sub> | <input type="checkbox"/> <sub>2</sub> | <input type="checkbox"/> <sub>3</sub> | <input type="checkbox"/> <sub>4</sub> |
| Strongly<br>Agree                     | Agree                                 | Neither                               | Disagree                              | Strongly<br>Disagree                  |



26. (havdo2) How many women aged 75 and older out of 1,000 will be told they have breast cancer in the next five years if they DO get a mammogram?

- <sub>1</sub> 0-4 out of 1,000 women aged 75 or older
- <sub>2</sub> 5-9 out of 1,000 women aged 75 or older
- <sub>3</sub> 10-19 out of 1,000 women aged 75 or older
- <sub>4</sub> 20-29 out of 1,000 women aged 75 or older
- <sub>5</sub> 30-49 out of 1,000 women aged 75 or older
- <sub>6</sub> 50-100 out of 1,000 women aged 75 or older

27. (diedonot2) How many women aged 75 and older out of 1,000 will die from breast cancer in the next five years if they DO NOT get a mammogram?

- <sub>1</sub> 0-4 out of 1,000 women aged 75 or older
- <sub>2</sub> 5-9 out of 1,000 women aged 75 or older
- <sub>3</sub> 10-19 out of 1,000 women aged 75 or older
- <sub>4</sub> 20-29 out of 1,000 women aged 75 or older
- <sub>5</sub> 30-49 out of 1,000 women aged 75 or older
- <sub>6</sub> 50-100 out of 1,000 women aged 75 or older

28. (diedo2) How many women aged 75 and older out of 1,000 will die of breast cancer in the next five years if they DO get a mammogram?

- <sub>1</sub> 0-4 out of 1,000 women aged 75 or older
- <sub>2</sub> 5-9 out of 1,000 women aged 75 or older
- <sub>3</sub> 10-19 out of 1,000 women aged 75 or older
- <sub>4</sub> 20-29 out of 1,000 women aged 75 or older
- <sub>5</sub> 30-49 out of 1,000 women aged 75 or older
- <sub>6</sub> 50-100 out of 1,000 women aged 75 or older

29. (abnobra2) How many women aged 75 or older out of 1,000 have a “false alarm” in the next 5 years (their mammogram is abnormal but additional tests do not show breast cancer)?

- <sub>1</sub> 0-4 out of 1,000 women aged 75 or older
- <sub>2</sub> 5-9 out of 1,000 women aged 75 or older
- <sub>3</sub> 10-19 out of 1,000 women aged 75 or older
- <sub>4</sub> 20-29 out of 1,000 women aged 75 or older
- <sub>5</sub> 30-49 out of 1,000 women aged 75 or older
- <sub>6</sub> 50-100 out of 1,000 women aged 75 or older

### KNOWLEDGE QUESTIONS

30. (diagbra2) Who is more likely to be diagnosed with breast cancer?

- <sub>1</sub> Women who have screening mammograms
- <sub>2</sub> Women who do NOT get screening mammograms
- <sub>3</sub> There is almost no difference
- <sub>99</sub> Don't know

31. (diebra2) Who is more likely to die from breast cancer?

- <sub>1</sub> Women who have screening mammograms
- <sub>2</sub> Women who do NOT get screening mammograms
- <sub>3</sub> There is almost no difference
- <sub>99</sub> Don't know

***The next few questions are True or False Questions. Please state whether each of the following statements is true or false (your best guess is fine).***

32. (benfind2) The benefit of getting a mammogram is finding and treating a breast cancer at an early stage that would have otherwise harmed a woman.

- <sub>1</sub> True
- <sub>2</sub> False

33. (prevbc2) Getting a mammogram will prevent an older woman from getting breast cancer.  
<sub>1</sub> True                      <sub>2</sub> False
34. (abhavbrc2) Most women who have an abnormal mammogram have breast cancer  
<sub>1</sub> True                      <sub>2</sub> False
35. (gretrisk2) Women aged 75 or older have a higher chance of getting breast cancer than younger women.  
<sub>1</sub> True                      <sub>2</sub> False
36. (heart2) More women aged 75 or older die of heart disease than breast cancer.  
<sub>1</sub> True                      <sub>2</sub> False
37. (otherprob2) Your other health problems affect whether or not you should get a mammogram.  
<sub>1</sub> True                      <sub>2</sub> False
38. (noshow2) Some breast cancers found by a mammogram would never have shown up or caused problems in a woman's lifetime.  
<sub>1</sub> True                      <sub>2</sub> False
39. (chemo2) Most women aged 75 or older with breast cancer are treated with chemotherapy.  
<sub>1</sub> True                      <sub>2</sub> False

#### **Section 4:**

**I will now ask you how important several factors were in your decision whether or not to get a mammogram on a scale from 0 to 10, where 0 means not at all important to you and 10 means extremely important to you.**

So first, how important is it to you:

40. (moretest) Having to go back after an abnormal mammogram for more tests even though in the end additional tests do not show breast cancer.

|                 |   |   |         |   |   |   |                 |   |   |   |
|-----------------|---|---|---------|---|---|---|-----------------|---|---|---|
| 10              | 9 | 8 | 7       | 6 | 5 | 4 | 3               | 2 | 1 | 0 |
| Extremely       |   |   | Neutral |   |   |   | Not at all      |   |   |   |
| important to me |   |   |         |   |   |   | important to me |   |   |   |



How important is it to you:

41. (nopro) The chance a mammogram may find a breast cancer that otherwise would never have caused any problems in your lifetime.

10 9 8 7 6 5 4 3 2 1 0  
Extremely Neutral Not at all  
important to me important to me

42. (knobody) How important is it to know everything going on with your body?

10 9 8 7 6 5 4 3 2 1 0  
Extremely Neutral Not at all  
important to me important to me

43. (smallbrc) Finding a breast cancer when it is small at an early stage when only a minor surgery is needed.

10 9 8 7 6 5 4 3 2 1 0  
Extremely Neutral Not at all  
important to me important to me

44. (normmamo) How important is the reassurance you get from a normal mammogram?

10 9 8 7 6 5 4 3 2 1 0  
Extremely Neutral Not at all  
important to me important to me

Now, please let me know if you strongly agree, agree, neither, disagree, or strongly disagree with the following statements:

45. (schmamo) It is easy for me to schedule a mammogram.

<sub>5</sub> <sub>4</sub> <sub>3</sub> <sub>2</sub> <sub>1</sub>  
Strongly Agree Agree Neither Disagree Strongly Disagree



49. (recdec) Help you recognize that a decision needs to be made about whether or not to get a mammogram?

<sub>1</sub>                      <sub>2</sub>                      <sub>3</sub>                      <sub>4</sub>                      <sub>5</sub>  
Not at all                      A little                      Somewhat                      Quite a bit                      A great deal

50. (prepdec) Prepare you to make a better decision about whether or not to get a mammogram?

<sub>1</sub>                      <sub>2</sub>                      <sub>3</sub>                      <sub>4</sub>                      <sub>5</sub>  
Not at all                      A little                      Somewhat                      Quite a bit                      A great deal

51. (proconmam) Help you think about the pros and cons of getting a mammogram?

<sub>1</sub>                      <sub>2</sub>                      <sub>3</sub>                      <sub>4</sub>                      <sub>5</sub>  
Not at all                      A little                      Somewhat                      Quite a bit                      A great deal

52. (proconimp) Help you think about which pros and cons about getting a mammogram are most important to you?

<sub>1</sub>                      <sub>2</sub>                      <sub>3</sub>                      <sub>4</sub>                      <sub>5</sub>  
Not at all                      A little                      Somewhat                      Quite a bit                      A great deal

53. (decdep) Help you know that the decision whether or not to get a mammogram depends on what matters most to you?

<sub>1</sub>                      <sub>2</sub>                      <sub>3</sub>                      <sub>4</sub>                      <sub>5</sub>  
Not at all                      A little                      Somewhat                      Quite a bit                      A great deal

**Did the educational pamphlet...**

54. (orgthot) Help you organize your own thoughts about the decision whether or not to get a mammogram?

<sub>1</sub>                      <sub>2</sub>                      <sub>3</sub>                      <sub>4</sub>                      <sub>5</sub>  
Not at all                      A little                      Somewhat                      Quite a bit                      A great deal

55. (invdec) Help you think about how involved you want to be in this decision?

<sub>1</sub>                      <sub>2</sub>                      <sub>3</sub>                      <sub>4</sub>                      <sub>5</sub>  
Not at all                      A little                      Somewhat                      Quite a bit                      A great deal

56. (idenque) Help you identify questions you want to ask your doctor about mammograms?

- <sub>1</sub>                      <sub>2</sub>                      <sub>3</sub>                      <sub>4</sub>                      <sub>5</sub>  
Not at all                      A little                      Somewhat                      Quite a bit                      A great deal

57. (prepdoc) Prepare you to talk to your doctor about what matters most to you about whether or not to get a mammogram?

- <sub>1</sub>                      <sub>2</sub>                      <sub>3</sub>                      <sub>4</sub>                      <sub>5</sub>  
Not at all                      A little                      Somewhat                      Quite a bit                      A great deal

58. (prepfu) Prepare you for a follow-up visit with your doctor?

- <sub>1</sub>                      <sub>2</sub>                      <sub>3</sub>                      <sub>4</sub>                      <sub>5</sub>  
Not at all                      A little                      Somewhat                      Quite a bit                      A great deal

## Section 6:

59. (length) The length of the education pamphlet was

- <sub>5</sub>                      <sub>4</sub>                      <sub>3</sub>                      <sub>2</sub>                      <sub>1</sub>  
Much too                      A little too                      Just right                      A little too                      Much too  
long                      long                                           short                      short

60. (amount) The amount of information was

- <sub>5</sub>                      <sub>4</sub>                      <sub>3</sub>                      <sub>2</sub>                      <sub>1</sub>  
Much less                      A little less                      Just right                      A little more                      Much more  
than needed                      than needed                                           than needed                      than needed

61. (newinfo) How much of the information was new?

- <sub>4</sub>                      <sub>3</sub>                      <sub>2</sub>                      <sub>1</sub>  
None was new                      Some was new                      Most was new                      All was new

62. (clerinfo) How clear was the information?

<sub>4</sub>

Everything  
was clear

<sub>3</sub>

Most things  
were clear

<sub>2</sub>

Some things  
were clear

<sub>1</sub>

Many things  
were unclear

63. (info) I found the information

<sub>5</sub>

Clearly slanted  
towards getting  
a mammogram

<sub>4</sub>

A little slanted  
towards getting  
a mammogram

<sub>3</sub>

Completely  
balanced

<sub>2</sub>

A little slanted  
towards NOT  
getting a mammogram

<sub>1</sub>

Clearly slanted  
towards NOT  
getting a mammogram

64. (anxious) Reading the education pamphlet made me feel:

<sub>4</sub>

<sub>3</sub>

Not anxious at all

<sub>2</sub>

A little anxious

<sub>1</sub>

Very anxious

As anxious as could be

65. (trust) How much did you trust the information in the pamphlet?

<sub>5</sub>

Completely

<sub>4</sub>

Mostly

<sub>3</sub>

Somewhat

<sub>2</sub>

A little bit

<sub>1</sub>

Not at all

66. (helpful) How helpful was the educational pamphlet in making a decision about mammography?

<sub>4</sub>

Very helpful

<sub>3</sub>

Somewhat helpful

<sub>2</sub>

A little helpful

<sub>1</sub>

Not helpful

Comments:

67. (understood) Please check the most accurate statement below:

- <sub>1</sub> I understood none of the information
- <sub>2</sub> I understood a little of the information
- <sub>3</sub> I understood most of the information
- <sub>4</sub> I fully understood all of the information

Comments:

68. (like) What did you like about the educational pamphlet?

69. (suggest) What suggestions do you have to improve the educational pamphlet?

70. (rec) Would you recommend the use of this educational pamphlet?

- |                                       |                                       |                                       |                                       |
|---------------------------------------|---------------------------------------|---------------------------------------|---------------------------------------|
| <input type="checkbox"/> <sub>4</sub> | <input type="checkbox"/> <sub>3</sub> | <input type="checkbox"/> <sub>2</sub> | <input type="checkbox"/> <sub>1</sub> |
| Definitely<br>Recommend               | Probably<br>Recommend                 | Probably not<br>Recommend             | Definitely not<br>Recommend           |

71. (papcomp) Would you prefer this educational pamphlet be on a computer or on paper?

- |                                       |                                       |                                       |
|---------------------------------------|---------------------------------------|---------------------------------------|
| <input type="checkbox"/> <sub>1</sub> | <input type="checkbox"/> <sub>2</sub> | <input type="checkbox"/> <sub>3</sub> |
| Computer                              | Paper                                 | No Preference                         |

Comments:

Thank you so much for your help. You will receive \$25 for participation in this study.
